# Supplementary material
Source: publisher figshare collection journal article supplement (https://tandf.figshare.com/ndownloader/files/18532799)
Supplement: Supplementary file 1 [file 18532799]

|  | | | **D** | | | | | | | | | | | |
| --- | --- | --- | --- | --- | --- | --- | --- | --- | --- | --- | --- | --- | --- | --- |
| **1** | | | | **2** | | | | **3** | | | |
| **METHOD** | | | | **METHOD** | | | | **METHOD** | | | |
| **1** | **2** | **3** | **4** | **1** | **2** | **3** | **4** | **1** | **2** | **3** | **4** |
| **PREP** | **PREP** | **PREP** | **PREP** | **PREP** | **PREP** | **PREP** | **PREP** | **PREP** | **PREP** | **PREP** | **PREP** |
| **Mean** | **Mean** | **Mean** | **Mean** | **Mean** | **Mean** | **Mean** | **Mean** | **Mean** | **Mean** | **Mean** | **Mean** |
| **MT** | **N** | **C** | 0.99 | 1.00 | 1.00 | 1.00 | 0.91 | 0.98 | 1.00 | 1.00 | 0.67 | 0.74 | 0.99 | 0.96 |
| **0** | **1** | **2** |
| **3** | 1.00 | 1.00 | 1.00 | 1.00 | 0.83 | 0.99 | 1.00 | 0.99 | 0.62 | 0.92 | 1.00 | 0.99 |
| **4** | 0.71 | 1.00 | 1.00 | 1.00 | 0.81 | 1.00 | 1.00 | 0.98 | 0.57 | 0.94 | 0.99 | 0.98 |
| **5** | 1.00 | 1.00 | 1.00 | 1.00 | 0.95 | 1.00 | 1.00 | 1.00 | 0.37 | 0.97 | 0.09 | 1.00 |
| **2** | **2** | 1.00 | 1.00 | 1.00 | 1.00 | 0.99 | 1.00 | 1.00 | 1.00 | 0.94 | 0.99 | 1.00 | 1.00 |
| **3** | 1.00 | 1.00 | 1.00 | 1.00 | 1.00 | 1.00 | 1.00 | 1.00 | 0.99 | 1.00 | 1.00 | 1.00 |
| **4** | 0.99 | 1.00 | 0.02 | 0.02 | 1.00 | 1.00 | 0.67 | 1.00 | 0.98 | 1.00 | 1.00 | 1.00 |
| **5** | 1.00 | 1.00 | 1.00 | 1.00 | 1.00 | 1.00 | 1.00 | 1.00 | 0.96 | 1.00 | 1.00 | 1.00 |
| **3** | **2** | 1.00 | 1.00 | 1.00 | 1.00 | 1.00 | 1.00 | 1.00 | 1.00 | 1.00 | 1.00 | 1.00 | 1.00 |
| **3** | 1.00 | 1.00 | 1.00 | 1.00 | 1.00 | 1.00 | 1.00 | 1.00 | 1.00 | 1.00 | 1.00 | 1.00 |
| **4** | 1.00 | 1.00 | 1.00 | 1.00 | 1.00 | 1.00 | 1.00 | 1.00 | 1.00 | 1.00 | 1.00 | 1.00 |
| **5** | 1.00 | 1.00 | 1.00 | 1.00 | 1.00 | 1.00 | 1.00 | 1.00 | 1.00 | 1.00 | 1.00 | 1.00 |
| **4** | **2** | 1.00 | 1.00 | 1.00 | 1.00 | 1.00 | 1.00 | 1.00 | 1.00 | 1.00 | 1.00 | 1.00 | 1.00 |
| **3** | 1.00 | 1.00 | 1.00 | 1.00 | 1.00 | 1.00 | 1.00 | 1.00 | 1.00 | 1.00 | 1.00 | 1.00 |
| **4** | 1.00 | 1.00 | 1.00 | 1.00 | 1.00 | 1.00 | 1.00 | 1.00 | 1.00 | 1.00 | 1.00 | 1.00 |
| **5** | 1.00 | 1.00 | 1.00 | 1.00 | 1.00 | 1.00 | 1.00 | 1.00 | 1.00 | 1.00 | 1.00 | 1.00 |
| **11** | **1** | **2** | 0.98 | 1.00 | 1.00 | 1.00 | 0.86 | 0.97 | 1.00 | 1.00 | 0.65 | 0.68 | 0.97 | 0.94 |
| **3** | 0.99 | 1.00 | 1.00 | 1.00 | 0.78 | 0.98 | 1.00 | 0.99 | 0.53 | 0.89 | 0.99 | 0.99 |
| **4** | 0.64 | 1.00 | 1.00 | 1.00 | 0.77 | 0.99 | 1.00 | 0.98 | 0.49 | 0.93 | 0.99 | 0.98 |
| **5** | 1.00 | 1.00 | 1.00 | 1.00 | 0.93 | 1.00 | 1.00 | 1.00 | 0.31 | 0.94 | 1.00 | 0.99 |
| **2** | **2** | 1.00 | 1.00 | 1.00 | 1.00 | 0.99 | 1.00 | 1.00 | 1.00 | 0.93 | 0.97 | 1.00 | 1.00 |
| **3** | 1.00 | 1.00 | 1.00 | 1.00 | 1.00 | 1.00 | 1.00 | 1.00 | 0.97 | 1.00 | 1.00 | 1.00 |
| **4** | 0.99 | 1.00 | 1.00 | 1.00 | 1.00 | 1.00 | 1.00 | 1.00 | 0.98 | 1.00 | 1.00 | 1.00 |
| **5** | 1.00 | 1.00 | 1.00 | 1.00 | 1.00 | 1.00 | 1.00 | 1.00 | 0.96 | 1.00 | 1.00 | 1.00 |
| **3** | **2** | 1.00 | 1.00 | 1.00 | 1.00 | 1.00 | 1.00 | 1.00 | 1.00 | 1.00 | 1.00 | 1.00 | 1.00 |
| **3** | 1.00 | 1.00 | 1.00 | 1.00 | 1.00 | 1.00 | 1.00 | 1.00 | 1.00 | 1.00 | 1.00 | 1.00 |
| **4** | 1.00 | 1.00 | 1.00 | 1.00 | 1.00 | 1.00 | 1.00 | 1.00 | 1.00 | 1.00 | 1.00 | 1.00 |
| **5** | 1.00 | 1.00 | 1.00 | 1.00 | 1.00 | 1.00 | 1.00 | 1.00 | 1.00 | 1.00 | 1.00 | 1.00 |
| **4** | **2** | 1.00 | 1.00 | 1.00 | 1.00 | 1.00 | 1.00 | 1.00 | 1.00 | 1.00 | 1.00 | 1.00 | 1.00 |
| **3** | 1.00 | 1.00 | 1.00 | 1.00 | 1.00 | 1.00 | 1.00 | 1.00 | 1.00 | 1.00 | 1.00 | 1.00 |
| **4** | 1.00 | 1.00 | 1.00 | 1.00 | 1.00 | 1.00 | 1.00 | 1.00 | 1.00 | 1.00 | 1.00 | 1.00 |
| **5** | 1.00 | 1.00 | 1.00 | 1.00 | 1.00 | 1.00 | 1.00 | 1.00 | 1.00 | 1.00 | 1.00 | 1.00 |
| **12** | **1** | **2** | 0.98 | 1.00 | 1.00 | 1.00 | 0.88 | 0.97 | 1.00 | 1.00 | 0.65 | 0.68 | 0.96 | 0.93 |
| **3** | 0.99 | 1.00 | 1.00 | 1.00 | 0.79 | 0.98 | 0.99 | 0.99 | 0.52 | 0.88 | 0.99 | 0.98 |
| **4** | 0.67 | 1.00 | 0.03 | 0.04 | 0.76 | 0.99 | 1.00 | 0.98 | 0.52 | 0.92 | 0.00 | 0.00 |
| **5** | 0.99 | 1.00 | 1.00 | 1.00 | 0.93 | 1.00 | 1.00 | 1.00 | 0.36 | 0.95 | 0.04 | 0.04 |
| **2** | **2** | 1.00 | 1.00 | 1.00 | 1.00 | 0.99 | 1.00 | 1.00 | 1.00 | 0.93 | 0.97 | 1.00 | 1.00 |
| **3** | 1.00 | 1.00 | 1.00 | 1.00 | 1.00 | 1.00 | 1.00 | 1.00 | 0.97 | 1.00 | 1.00 | 1.00 |
| **4** | 0.99 | 1.00 | 1.00 | 1.00 | 0.99 | 1.00 | 1.00 | 1.00 | 0.98 | 1.00 | 1.00 | 1.00 |
| **5** | 1.00 | 1.00 | 1.00 | 1.00 | 1.00 | 1.00 | 1.00 | 1.00 | 0.96 | 1.00 | 1.00 | 1.00 |
| **3** | **2** | 1.00 | 1.00 | 1.00 | 1.00 | 1.00 | 1.00 | 1.00 | 1.00 | 1.00 | 1.00 | 1.00 | 1.00 |
| **3** | 1.00 | 1.00 | 1.00 | 1.00 | 1.00 | 1.00 | 1.00 | 1.00 | 1.00 | 1.00 | 1.00 | 1.00 |
| **4** | 1.00 | 1.00 | 1.00 | 1.00 | 1.00 | 1.00 | 1.00 | 1.00 | 1.00 | 1.00 | 1.00 | 1.00 |
| **5** | 1.00 | 1.00 | 1.00 | 1.00 | 1.00 | 1.00 | 1.00 | 1.00 | 1.00 | 1.00 | 1.00 | 1.00 |
| **4** | **2** | 1.00 | 1.00 | 1.00 | 1.00 | 1.00 | 1.00 | 1.00 | 1.00 | 1.00 | 1.00 | 1.00 | 1.00 |
| **3** | 1.00 | 1.00 | 1.00 | 1.00 | 1.00 | 1.00 | 1.00 | 1.00 | 1.00 | 1.00 | 1.00 | 1.00 |
| **4** | 1.00 | 1.00 | 1.00 | 1.00 | 1.00 | 1.00 | 1.00 | 1.00 | 1.00 | 1.00 | 1.00 | 1.00 |
| **5** | 1.00 | 1.00 | 1.00 | 1.00 | 1.00 | 1.00 | 1.00 | 1.00 | 1.00 | 1.00 | 1.00 | 1.00 |
| **21** | **1** | **2** | 0.80 | 0.98 | 1.00 | 1.00 | 0.59 | 0.69 | 0.99 | 0.96 | 0.49 | 0.25 | 0.84 | 0.78 |
| **3** | 0.86 | 0.99 | 1.00 | 1.00 | 0.26 | 0.77 | 0.04 | 0.04 | 0.09 | 0.46 | 0.96 | 0.89 |
| **4** | 0.27 | 1.00 | 1.00 | 1.00 | 0.27 | 0.85 | 0.06 | 0.05 | 0.11 | 0.58 | 0.95 | 0.89 |
| **5** | 0.95 | 1.00 | 1.00 | 1.00 | 0.67 | 0.98 | 0.03 | 0.03 | 0.05 | 0.65 | 0.00 | 0.00 |
| **2** | **2** | 0.97 | 1.00 | 1.00 | 1.00 | 0.87 | 0.98 | 1.00 | 1.00 | 0.72 | 0.73 | 0.99 | 0.97 |
| **3** | 0.99 | 1.00 | 1.00 | 1.00 | 0.86 | 0.99 | 1.00 | 0.99 | 0.59 | 0.92 | 1.00 | 1.00 |
| **4** | 0.93 | 1.00 | 1.00 | 1.00 | 0.91 | 0.99 | 1.00 | 1.00 | 0.77 | 0.95 | 1.00 | 1.00 |
| **5** | 1.00 | 1.00 | 1.00 | 1.00 | 0.98 | 1.00 | 1.00 | 1.00 | 0.73 | 0.97 | 1.00 | 1.00 |
| **3** | **2** | 1.00 | 1.00 | 1.00 | 1.00 | 1.00 | 1.00 | 1.00 | 1.00 | 0.97 | 1.00 | 1.00 | 1.00 |
| **3** | 1.00 | 1.00 | 1.00 | 1.00 | 1.00 | 1.00 | 1.00 | 1.00 | 1.00 | 1.00 | 1.00 | 1.00 |
| **4** | 1.00 | 1.00 | 1.00 | 1.00 | 1.00 | 1.00 | 1.00 | 1.00 | 1.00 | 1.00 | 1.00 | 1.00 |
| **5** | 1.00 | 1.00 | 1.00 | 1.00 | 1.00 | 1.00 | 1.00 | 1.00 | 1.00 | 1.00 | 1.00 | 1.00 |
| **4** | **2** | 1.00 | 1.00 | 1.00 | 1.00 | 1.00 | 1.00 | 1.00 | 1.00 | 1.00 | 1.00 | 1.00 | 1.00 |
| **3** | 1.00 | 1.00 | 1.00 | 1.00 | 1.00 | 1.00 | 1.00 | 1.00 | 1.00 | 1.00 | 1.00 | 1.00 |
| **4** | 1.00 | 1.00 | 1.00 | 1.00 | 1.00 | 1.00 | 1.00 | 1.00 | 1.00 | 1.00 | 1.00 | 1.00 |
| **5** | 1.00 | 1.00 | 1.00 | 1.00 | 1.00 | 1.00 | 1.00 | 1.00 | 1.00 | 1.00 | 1.00 | 1.00 |
| **22** | **1** | **2** | 0.85 | 0.98 | 1.00 | 1.00 | 0.63 | 0.80 | 0.98 | 0.96 | 0.52 | 0.35 | 0.89 | 0.82 |
| **3** | 0.88 | 0.99 | 1.00 | 1.00 | 0.39 | 0.86 | 0.00 | 0.00 | 0.19 | 0.58 | 0.97 | 0.91 |
| **4** | 0.25 | 0.99 | 1.00 | 1.00 | 0.35 | 0.89 | 0.05 | 0.04 | 0.11 | 0.64 | 0.05 | 0.05 |
| **5** | 0.93 | 1.00 | 1.00 | 1.00 | 0.72 | 0.97 | 0.02 | 0.02 | 0.06 | 0.71 | 0.00 | 0.00 |
| **2** | **2** | 0.99 | 1.00 | 1.00 | 1.00 | 0.91 | 0.99 | 1.00 | 1.00 | 0.77 | 0.79 | 0.99 | 0.98 |
| **3** | 1.00 | 1.00 | 1.00 | 1.00 | 0.93 | 1.00 | 1.00 | 0.99 | 0.72 | 0.94 | 1.00 | 1.00 |
| **4** | 0.88 | 1.00 | 1.00 | 1.00 | 0.94 | 1.00 | 1.00 | 1.00 | 0.79 | 0.95 | 1.00 | 1.00 |
| **5** | 1.00 | 1.00 | 1.00 | 1.00 | 0.99 | 1.00 | 1.00 | 1.00 | 0.74 | 0.98 | 1.00 | 1.00 |
| **3** | **2** | 1.00 | 1.00 | 1.00 | 1.00 | 1.00 | 1.00 | 1.00 | 1.00 | 0.98 | 1.00 | 1.00 | 1.00 |
| **3** | 1.00 | 1.00 | 1.00 | 1.00 | 1.00 | 1.00 | 1.00 | 1.00 | 1.00 | 1.00 | 1.00 | 1.00 |
| **4** | 1.00 | 1.00 | 1.00 | 1.00 | 1.00 | 1.00 | 1.00 | 1.00 | 1.00 | 1.00 | 1.00 | 1.00 |
| **5** | 1.00 | 1.00 | 1.00 | 1.00 | 1.00 | 1.00 | 1.00 | 1.00 | 1.00 | 1.00 | 1.00 | 1.00 |
| **4** | **2** | 1.00 | 1.00 | 1.00 | 1.00 | 1.00 | 1.00 | 1.00 | 1.00 | 1.00 | 1.00 | 1.00 | 1.00 |
| **3** | 1.00 | 1.00 | 1.00 | 1.00 | 1.00 | 1.00 | 1.00 | 1.00 | 1.00 | 1.00 | 1.00 | 1.00 |
| **4** | 1.00 | 1.00 | 1.00 | 1.00 | 1.00 | 1.00 | 1.00 | 1.00 | 1.00 | 1.00 | 1.00 | 1.00 |
| **5** | 1.00 | 1.00 | 1.00 | 1.00 | 1.00 | 1.00 | 1.00 | 1.00 | 1.00 | 1.00 | 1.00 | 1.00 |

|  | | | **D** | | | | | | | | | | | |
| --- | --- | --- | --- | --- | --- | --- | --- | --- | --- | --- | --- | --- | --- | --- |
| **1** | | | | **2** | | | | **3** | | | |
| **METHOD** | | | | **METHOD** | | | | **METHOD** | | | |
| **1** | **2** | **3** | **4** | **1** | **2** | **3** | **4** | **1** | **2** | **3** | **4** |
| **BL** | **BL** | **BL** | **BL** | **BL** | **BL** | **BL** | **BL** | **BL** | **BL** | **BL** | **BL** |
| **Mean** | **Mean** | **Mean** | **Mean** | **Mean** | **Mean** | **Mean** | **Mean** | **Mean** | **Mean** | **Mean** | **Mean** |
| **MT** | **N** | **C** | 0.00 | -0.19 | -0.00 | -0.00 | -0.00 | -0.26 | -0.01 | -0.01 | -0.00 | -0.39 | -0.03 | -0.03 |
| **0** | **1** | **2** |
| **3** | 0.01 | -0.13 | 0.00 | 0.00 | 0.01 | -0.22 | -0.00 | -0.00 | 0.00 | -0.24 | -0.01 | -0.01 |
| **4** | 0.01 | -0.11 | 0.00 | 0.00 | 0.00 | -0.20 | -0.00 | -0.00 | -0.00 | -0.26 | -0.00 | -0.00 |
| **5** | 0.01 | -0.06 | 0.00 | 0.00 | 0.01 | -0.12 | 0.01 | 0.01 | 0.02 | -0.22 | -0.32 | 0.00 |
| **2** | **2** | 0.00 | -0.18 | 0.00 | 0.00 | 0.00 | -0.28 | -0.00 | -0.00 | -0.00 | -0.34 | -0.01 | -0.01 |
| **3** | 0.00 | -0.14 | 0.00 | 0.00 | 0.00 | -0.22 | 0.00 | 0.00 | 0.00 | -0.24 | -0.00 | -0.00 |
| **4** | 0.00 | -0.11 | 0.06 | 0.06 | 0.00 | -0.20 | -0.00 | -0.00 | 0.00 | -0.26 | 0.00 | 0.00 |
| **5** | 0.00 | -0.06 | 0.00 | 0.00 | 0.00 | -0.12 | 0.00 | 0.00 | 0.00 | -0.22 | 0.00 | 0.00 |
| **3** | **2** | -0.00 | -0.19 | -0.00 | -0.00 | 0.00 | -0.49 | -0.00 | -0.00 | -0.00 | -0.34 | -0.00 | -0.00 |
| **3** | 0.00 | -0.13 | 0.00 | 0.00 | 0.00 | -0.22 | -0.00 | -0.00 | 0.00 | -0.24 | -0.00 | -0.00 |
| **4** | 0.00 | -0.11 | 0.00 | 0.00 | 0.00 | -0.19 | 0.00 | 0.00 | 0.00 | -0.25 | 0.00 | 0.00 |
| **5** | 0.00 | -0.06 | 0.00 | 0.00 | 0.00 | -0.12 | 0.00 | 0.00 | 0.00 | -0.21 | 0.00 | 0.00 |
| **4** | **2** | 0.00 | -0.18 | 0.00 | 0.00 | 0.00 | -0.61 | -0.00 | -0.00 | -0.00 | -0.40 | -0.00 | -0.00 |
| **3** | 0.00 | -0.13 | 0.00 | 0.00 | -0.00 | -0.22 | -0.00 | -0.00 | -0.00 | -0.24 | -0.00 | -0.00 |
| **4** | 0.00 | -0.11 | 0.00 | 0.00 | 0.00 | -0.19 | -0.00 | -0.00 | 0.00 | -0.25 | 0.00 | 0.00 |
| **5** | 0.00 | -0.06 | 0.00 | 0.00 | 0.00 | -0.12 | 0.00 | 0.00 | 0.00 | -0.21 | 0.00 | 0.00 |
| **11** | **1** | **2** | 0.00 | -0.19 | -0.00 | -0.00 | 0.00 | -0.26 | -0.01 | -0.01 | 0.01 | -0.38 | -0.04 | -0.04 |
| **3** | 0.01 | -0.14 | 0.00 | 0.00 | 0.00 | -0.23 | -0.01 | -0.01 | 0.01 | -0.24 | -0.01 | -0.01 |
| **4** | 0.01 | -0.11 | 0.01 | 0.01 | -0.00 | -0.20 | -0.01 | -0.01 | 0.01 | -0.26 | 0.00 | 0.00 |
| **5** | 0.00 | -0.06 | 0.00 | 0.00 | 0.01 | -0.12 | 0.00 | 0.00 | 0.02 | -0.22 | 0.00 | 0.00 |
| **2** | **2** | 0.00 | -0.19 | -0.00 | -0.00 | 0.00 | -0.28 | -0.00 | -0.00 | 0.00 | -0.35 | -0.01 | -0.01 |
| **3** | 0.00 | -0.14 | 0.00 | 0.00 | -0.00 | -0.22 | -0.01 | -0.01 | -0.00 | -0.24 | -0.01 | -0.01 |
| **4** | 0.01 | -0.11 | 0.00 | 0.00 | 0.00 | -0.20 | -0.00 | -0.00 | 0.01 | -0.26 | 0.00 | 0.00 |
| **5** | 0.00 | -0.06 | 0.00 | 0.00 | 0.00 | -0.12 | 0.00 | 0.00 | 0.01 | -0.21 | 0.01 | 0.01 |
| **3** | **2** | 0.00 | -0.18 | -0.00 | -0.00 | 0.00 | -0.50 | -0.00 | -0.00 | 0.00 | -0.35 | -0.00 | -0.00 |
| **3** | 0.00 | -0.13 | 0.00 | 0.00 | -0.00 | -0.22 | -0.00 | -0.00 | 0.00 | -0.23 | -0.00 | -0.00 |
| **4** | 0.00 | -0.11 | 0.00 | 0.00 | -0.00 | -0.20 | -0.00 | -0.00 | 0.00 | -0.25 | 0.00 | 0.00 |
| **5** | 0.00 | -0.06 | 0.00 | 0.00 | 0.00 | -0.12 | 0.00 | 0.00 | 0.00 | -0.21 | 0.00 | 0.00 |
| **4** | **2** | 0.00 | -0.18 | -0.00 | -0.00 | 0.00 | -0.57 | -0.00 | -0.00 | -0.00 | -0.36 | -0.00 | -0.00 |
| **3** | 0.00 | -0.13 | 0.00 | 0.00 | 0.00 | -0.22 | -0.00 | -0.00 | 0.00 | -0.23 | -0.00 | -0.00 |
| **4** | 0.00 | -0.11 | 0.00 | 0.00 | 0.00 | -0.19 | -0.00 | -0.00 | 0.00 | -0.26 | 0.00 | 0.00 |
| **5** | 0.00 | -0.06 | -0.00 | -0.00 | 0.00 | -0.12 | 0.00 | 0.00 | -0.00 | -0.21 | -0.00 | -0.00 |
| **12** | **1** | **2** | 0.00 | -0.19 | -0.00 | -0.00 | 0.01 | -0.26 | -0.01 | -0.01 | 0.00 | -0.39 | -0.04 | -0.03 |
| **3** | 0.01 | -0.14 | 0.00 | 0.00 | 0.00 | -0.22 | -0.01 | -0.01 | 0.01 | -0.24 | -0.01 | -0.01 |
| **4** | 0.01 | -0.11 | -0.03 | -0.07 | 0.00 | -0.20 | -0.00 | -0.00 | 0.01 | -0.26 | -0.07 | -0.07 |
| **5** | 0.00 | -0.06 | 0.00 | 0.00 | 0.00 | -0.13 | 0.00 | 0.00 | 0.02 | -0.22 | 0.00 | 0.00 |
| **2** | **2** | 0.00 | -0.18 | 0.00 | 0.00 | 0.00 | -0.29 | -0.00 | -0.00 | 0.00 | -0.35 | -0.01 | -0.01 |
| **3** | 0.00 | -0.14 | 0.00 | 0.00 | 0.00 | -0.22 | -0.00 | -0.00 | 0.00 | -0.24 | -0.00 | -0.00 |
| **4** | 0.00 | -0.11 | 0.00 | 0.00 | 0.00 | -0.20 | -0.00 | -0.00 | 0.00 | -0.26 | 0.00 | 0.00 |
| **5** | -0.00 | -0.06 | -0.00 | -0.00 | 0.00 | -0.12 | 0.00 | 0.00 | 0.01 | -0.22 | 0.00 | 0.00 |
| **3** | **2** | 0.00 | -0.18 | -0.00 | -0.00 | 0.00 | -0.47 | -0.00 | -0.00 | 0.00 | -0.38 | -0.00 | -0.00 |
| **3** | -0.00 | -0.13 | 0.00 | 0.00 | 0.00 | -0.22 | -0.00 | -0.00 | 0.00 | -0.24 | -0.00 | -0.00 |
| **4** | 0.00 | -0.11 | 0.00 | 0.00 | 0.00 | -0.20 | -0.00 | -0.00 | 0.00 | -0.26 | -0.00 | -0.00 |
| **5** | -0.00 | -0.06 | 0.00 | 0.00 | 0.00 | -0.12 | -0.00 | -0.00 | 0.00 | -0.21 | 0.00 | 0.00 |
| **4** | **2** | 0.00 | -0.18 | 0.00 | 0.00 | 0.00 | -0.53 | -0.00 | -0.00 | 0.00 | -0.42 | -0.00 | -0.00 |
| **3** | -0.00 | -0.13 | 0.00 | 0.00 | 0.00 | -0.22 | 0.00 | 0.00 | 0.00 | -0.24 | -0.00 | -0.00 |
| **4** | -0.00 | -0.11 | 0.00 | 0.00 | 0.00 | -0.20 | -0.00 | -0.00 | 0.00 | -0.26 | 0.00 | 0.00 |
| **5** | -0.00 | -0.06 | 0.00 | 0.00 | -0.00 | -0.12 | -0.00 | -0.00 | 0.00 | -0.21 | 0.00 | 0.00 |
| **21** | **1** | **2** | 0.02 | -0.18 | 0.00 | 0.00 | 0.01 | -0.25 | -0.02 | -0.02 | 0.07 | -0.32 | -0.07 | -0.08 |
| **3** | 0.01 | -0.14 | 0.00 | 0.00 | -0.01 | -0.22 | -0.01 | -0.01 | -0.03 | -0.22 | -0.03 | -0.02 |
| **4** | 0.02 | -0.11 | 0.01 | 0.01 | -0.00 | -0.19 | -0.00 | 0.00 | 0.05 | -0.25 | -0.01 | -0.01 |
| **5** | 0.01 | -0.06 | 0.00 | 0.00 | 0.01 | -0.12 | -0.00 | -0.00 | 0.03 | -0.21 | -0.10 | -0.10 |
| **2** | **2** | 0.01 | -0.18 | 0.00 | 0.00 | 0.00 | -0.28 | -0.01 | -0.01 | 0.03 | -0.35 | -0.03 | -0.03 |
| **3** | 0.01 | -0.13 | 0.00 | 0.00 | -0.00 | -0.22 | -0.01 | -0.01 | 0.00 | -0.24 | -0.01 | -0.01 |
| **4** | 0.01 | -0.11 | 0.01 | 0.01 | 0.00 | -0.19 | -0.00 | -0.00 | 0.02 | -0.26 | -0.00 | -0.00 |
| **5** | 0.00 | -0.06 | 0.00 | 0.00 | 0.01 | -0.12 | 0.01 | 0.01 | 0.01 | -0.21 | 0.00 | 0.00 |
| **3** | **2** | 0.00 | -0.18 | -0.00 | -0.00 | 0.00 | -0.40 | -0.00 | -0.00 | 0.00 | -0.49 | -0.01 | -0.01 |
| **3** | 0.00 | -0.13 | 0.00 | 0.00 | 0.00 | -0.22 | 0.00 | 0.00 | 0.00 | -0.23 | -0.00 | -0.00 |
| **4** | 0.00 | -0.11 | 0.00 | 0.00 | 0.00 | -0.19 | -0.00 | -0.00 | 0.01 | -0.25 | 0.00 | 0.00 |
| **5** | 0.00 | -0.06 | 0.00 | 0.00 | 0.00 | -0.12 | 0.00 | 0.00 | 0.00 | -0.21 | 0.00 | 0.00 |
| **4** | **2** | 0.00 | -0.18 | 0.00 | 0.00 | 0.00 | -0.50 | -0.00 | -0.00 | 0.00 | -0.48 | -0.00 | -0.00 |
| **3** | 0.00 | -0.13 | 0.00 | 0.00 | 0.00 | -0.22 | -0.00 | -0.00 | 0.00 | -0.23 | -0.00 | -0.00 |
| **4** | 0.00 | -0.11 | 0.00 | 0.00 | 0.00 | -0.19 | -0.00 | -0.00 | 0.00 | -0.25 | -0.00 | -0.00 |
| **5** | 0.00 | -0.06 | 0.00 | 0.00 | 0.00 | -0.12 | 0.00 | 0.00 | 0.00 | -0.21 | 0.00 | 0.00 |
| **22** | **1** | **2** | -0.02 | -0.19 | -0.00 | -0.00 | 0.01 | -0.26 | -0.02 | -0.01 | 0.05 | -0.32 | -0.06 | -0.07 |
| **3** | -0.00 | -0.14 | 0.00 | 0.00 | -0.00 | -0.23 | 0.05 | 0.05 | -0.01 | -0.23 | -0.03 | -0.03 |
| **4** | 0.00 | -0.11 | 0.01 | 0.01 | 0.01 | -0.20 | -0.01 | -0.01 | 0.05 | -0.25 | -0.03 | -0.02 |
| **5** | -0.00 | -0.06 | 0.01 | 0.01 | 0.01 | -0.13 | -0.04 | -0.04 | 0.05 | -0.22 | -0.12 | -0.12 |
| **2** | **2** | -0.02 | -0.18 | 0.00 | 0.00 | 0.01 | -0.28 | -0.00 | -0.00 | 0.01 | -0.38 | -0.03 | -0.03 |
| **3** | -0.01 | -0.13 | 0.00 | 0.00 | 0.00 | -0.23 | -0.00 | -0.00 | 0.00 | -0.25 | -0.01 | -0.01 |
| **4** | -0.01 | -0.11 | 0.00 | 0.00 | 0.00 | -0.21 | -0.00 | -0.00 | 0.02 | -0.26 | 0.00 | 0.00 |
| **5** | -0.01 | -0.06 | 0.00 | 0.00 | 0.00 | -0.13 | 0.00 | 0.00 | 0.02 | -0.22 | 0.00 | 0.00 |
| **3** | **2** | -0.03 | -0.18 | 0.00 | 0.00 | 0.00 | -0.35 | -0.00 | -0.00 | 0.00 | -0.50 | -0.01 | -0.01 |
| **3** | -0.01 | -0.13 | 0.00 | 0.00 | 0.00 | -0.23 | -0.00 | -0.00 | 0.00 | -0.25 | -0.00 | -0.00 |
| **4** | -0.01 | -0.11 | 0.00 | 0.00 | 0.00 | -0.20 | 0.00 | 0.00 | 0.01 | -0.26 | 0.00 | 0.00 |
| **5** | -0.01 | -0.06 | 0.00 | 0.00 | -0.00 | -0.13 | 0.00 | 0.00 | 0.00 | -0.22 | 0.00 | 0.00 |
| **4** | **2** | -0.03 | -0.18 | 0.00 | 0.00 | 0.00 | -0.35 | -0.00 | -0.00 | 0.00 | -0.50 | -0.00 | -0.00 |
| **3** | -0.01 | -0.13 | 0.00 | 0.00 | -0.00 | -0.23 | -0.00 | -0.00 | 0.00 | -0.24 | -0.00 | -0.00 |
| **4** | -0.01 | -0.11 | 0.00 | 0.00 | -0.00 | -0.21 | -0.00 | -0.00 | 0.00 | -0.26 | 0.00 | 0.00 |
| **5** | -0.01 | -0.06 | 0.00 | 0.00 | -0.00 | -0.13 | 0.00 | 0.00 | 0.00 | -0.22 | 0.00 | 0.00 |

|  | | | **D** | | | | | | | | | | | |
| --- | --- | --- | --- | --- | --- | --- | --- | --- | --- | --- | --- | --- | --- | --- |
| **1** | | | | **2** | | | | **3** | | | |
| **METHOD** | | | | **METHOD** | | | | **METHOD** | | | |
| **1** | **2** | **3** | **4** | **1** | **2** | **3** | **4** | **1** | **2** | **3** | **4** |
| **BC** | **BC** | **BC** | **BC** | **BC** | **BC** | **BC** | **BC** | **BC** | **BC** | **BC** | **BC** |
| **Mean** | **Mean** | **Mean** | **Mean** | **Mean** | **Mean** | **Mean** | **Mean** | **Mean** | **Mean** | **Mean** | **Mean** |
| **MT** | **N** | **C** | 0.03 | -0.07 | -0.02 | -0.02 | 0.12 | -0.15 | 0.04 | 0.04 | 0.34 | -0.21 | -0.00 | 0.00 |
| **0** | **1** | **2** |
| **3** | 0.03 | -0.02 | -0.01 | -0.01 | 0.07 | -0.18 | 0.00 | 0.01 | 0.03 | -0.27 | 0.01 | 0.01 |
| **4** | 0.07 | -0.01 | -0.01 | -0.01 | 0.03 | -0.18 | 0.01 | 0.01 | -0.62 | -0.19 | 0.03 | 0.03 |
| **5** | 0.03 | -0.00 | 0.00 | 0.00 | 0.05 | -0.05 | 0.01 | 0.01 | -0.26 | -0.22 | -0.65 | 0.00 |
| **2** | **2** | 0.03 | -0.04 | 0.00 | 0.00 | 0.05 | -0.16 | 0.01 | 0.01 | 0.11 | -0.26 | 0.04 | 0.04 |
| **3** | 0.01 | -0.02 | -0.01 | -0.01 | 0.05 | -0.14 | 0.01 | 0.01 | 0.01 | -0.25 | 0.01 | 0.01 |
| **4** | 0.02 | -0.01 | 0.20 | 0.20 | 0.04 | -0.14 | 0.03 | 0.02 | -0.21 | -0.16 | 0.03 | 0.03 |
| **5** | 0.01 | -0.01 | -0.01 | -0.01 | 0.01 | -0.06 | -0.01 | -0.01 | 0.01 | -0.18 | 0.02 | 0.02 |
| **3** | **2** | 0.01 | -0.05 | -0.00 | -0.00 | 0.01 | -0.16 | -0.00 | -0.00 | 0.03 | -0.30 | -0.00 | -0.00 |
| **3** | 0.01 | -0.01 | -0.00 | -0.00 | 0.02 | -0.14 | 0.01 | 0.01 | 0.01 | -0.24 | 0.01 | 0.01 |
| **4** | 0.01 | -0.00 | 0.00 | 0.00 | 0.02 | -0.14 | 0.01 | 0.01 | 0.02 | -0.15 | 0.00 | 0.00 |
| **5** | 0.00 | -0.01 | -0.01 | -0.01 | 0.00 | -0.06 | -0.01 | -0.01 | 0.01 | -0.17 | -0.00 | -0.00 |
| **4** | **2** | 0.00 | -0.04 | -0.00 | -0.00 | -0.00 | -0.16 | -0.01 | -0.01 | 0.02 | -0.32 | 0.00 | 0.00 |
| **3** | 0.01 | 0.00 | 0.00 | 0.00 | 0.00 | -0.15 | -0.00 | -0.00 | -0.00 | -0.24 | -0.01 | -0.01 |
| **4** | 0.01 | 0.00 | 0.01 | 0.01 | 0.00 | -0.14 | 0.00 | 0.00 | -0.00 | -0.15 | -0.00 | -0.00 |
| **5** | 0.00 | -0.00 | 0.00 | 0.00 | 0.01 | -0.05 | 0.00 | 0.00 | 0.00 | -0.15 | -0.00 | -0.00 |
| **11** | **1** | **2** | 0.08 | -0.04 | 0.03 | 0.03 | 0.13 | -0.17 | 0.02 | 0.02 | 0.44 | -0.22 | -0.05 | -0.04 |
| **3** | 0.06 | -0.01 | 0.00 | 0.00 | 0.05 | -0.18 | 0.01 | 0.01 | -0.01 | -0.27 | 0.02 | 0.02 |
| **4** | 0.07 | 0.00 | 0.01 | 0.01 | 0.02 | -0.18 | 0.02 | 0.02 | -0.36 | -0.17 | 0.03 | 0.03 |
| **5** | 0.04 | 0.00 | 0.01 | 0.01 | 0.03 | -0.08 | -0.00 | -0.00 | 0.02 | -0.19 | 0.02 | 0.03 |
| **2** | **2** | 0.04 | -0.04 | 0.01 | 0.01 | 0.01 | -0.20 | -0.02 | -0.02 | 0.19 | -0.31 | 0.02 | 0.02 |
| **3** | 0.04 | 0.01 | 0.01 | 0.01 | 0.01 | -0.18 | -0.02 | -0.02 | 0.01 | -0.28 | -0.00 | -0.00 |
| **4** | 0.02 | -0.00 | -0.00 | -0.00 | 0.02 | -0.16 | 0.00 | 0.00 | -0.00 | -0.16 | 0.03 | 0.03 |
| **5** | 0.02 | -0.01 | -0.00 | -0.00 | 0.03 | -0.05 | 0.01 | 0.01 | 0.01 | -0.20 | -0.01 | -0.01 |
| **3** | **2** | 0.01 | -0.05 | -0.00 | -0.00 | 0.02 | -0.15 | 0.01 | 0.01 | 0.05 | -0.31 | 0.01 | 0.01 |
| **3** | 0.01 | 0.00 | 0.00 | 0.00 | 0.00 | -0.16 | -0.01 | -0.01 | 0.02 | -0.24 | 0.02 | 0.02 |
| **4** | 0.00 | -0.01 | -0.00 | -0.00 | 0.01 | -0.14 | 0.01 | 0.01 | 0.01 | -0.16 | 0.00 | 0.00 |
| **5** | 0.00 | -0.01 | -0.00 | -0.00 | 0.00 | -0.06 | -0.00 | -0.00 | 0.02 | -0.16 | 0.00 | 0.00 |
| **4** | **2** | 0.00 | -0.05 | -0.00 | -0.00 | 0.01 | -0.15 | -0.00 | -0.00 | 0.03 | -0.29 | 0.01 | 0.01 |
| **3** | 0.01 | 0.00 | 0.01 | 0.01 | 0.01 | -0.15 | 0.00 | 0.00 | 0.01 | -0.23 | 0.00 | 0.00 |
| **4** | 0.01 | 0.00 | 0.00 | 0.00 | 0.00 | -0.14 | 0.00 | 0.00 | 0.01 | -0.14 | 0.00 | 0.00 |
| **5** | 0.00 | -0.00 | 0.00 | 0.00 | 0.01 | -0.05 | 0.00 | 0.00 | -0.01 | -0.16 | -0.01 | -0.01 |
| **12** | **1** | **2** | 0.05 | -0.07 | -0.01 | -0.01 | 0.09 | -0.20 | -0.02 | -0.02 | 0.44 | -0.21 | -0.02 | -0.02 |
| **3** | 0.06 | 0.02 | 0.02 | 0.02 | 0.06 | -0.17 | 0.02 | 0.01 | -0.02 | -0.26 | -0.01 | -0.00 |
| **4** | 0.05 | -0.00 | -0.04 | -0.20 | 0.05 | -0.18 | 0.00 | 0.01 | -0.47 | -0.20 | -0.38 | -0.38 |
| **5** | 0.03 | -0.00 | 0.00 | 0.00 | 0.06 | -0.06 | 0.01 | 0.01 | -0.01 | -0.17 | 0.00 | 0.00 |
| **2** | **2** | 0.04 | -0.04 | 0.01 | 0.01 | 0.04 | -0.17 | 0.00 | 0.00 | 0.19 | -0.29 | 0.03 | 0.03 |
| **3** | 0.00 | -0.02 | -0.01 | -0.01 | 0.03 | -0.17 | -0.00 | -0.00 | 0.02 | -0.26 | 0.02 | 0.02 |
| **4** | 0.01 | -0.01 | -0.01 | -0.01 | 0.00 | -0.18 | -0.02 | -0.02 | -0.09 | -0.18 | 0.02 | 0.02 |
| **5** | -0.00 | -0.01 | -0.01 | -0.01 | 0.02 | -0.06 | 0.00 | 0.00 | 0.03 | -0.19 | 0.02 | 0.02 |
| **3** | **2** | 0.01 | -0.05 | -0.01 | -0.01 | 0.02 | -0.15 | 0.01 | 0.01 | 0.02 | -0.40 | -0.03 | -0.03 |
| **3** | 0.00 | -0.00 | -0.00 | -0.00 | 0.01 | -0.15 | 0.00 | 0.00 | 0.01 | -0.25 | -0.00 | -0.00 |
| **4** | -0.00 | -0.01 | -0.00 | -0.00 | 0.01 | -0.15 | 0.00 | 0.00 | 0.01 | -0.16 | 0.00 | 0.00 |
| **5** | 0.01 | 0.01 | 0.01 | 0.01 | 0.01 | -0.06 | 0.00 | 0.00 | 0.01 | -0.17 | -0.00 | -0.00 |
| **4** | **2** | -0.00 | -0.05 | -0.01 | -0.01 | 0.01 | -0.15 | -0.00 | -0.00 | 0.02 | -0.35 | 0.00 | 0.00 |
| **3** | -0.00 | -0.00 | -0.00 | -0.00 | 0.01 | -0.15 | -0.00 | -0.00 | 0.00 | -0.24 | -0.00 | -0.00 |
| **4** | 0.00 | 0.00 | 0.00 | 0.00 | 0.01 | -0.14 | -0.00 | -0.00 | 0.01 | -0.14 | 0.00 | 0.00 |
| **5** | -0.00 | -0.00 | 0.00 | 0.00 | 0.00 | -0.05 | 0.00 | 0.00 | 0.00 | -0.16 | -0.00 | -0.00 |
| **21** | **1** | **2** | 0.08 | -0.11 | -0.04 | -0.04 | 0.51 | -0.11 | 0.05 | 0.05 | 1.26 | -0.14 | -0.03 | -0.06 |
| **3** | 0.11 | -0.00 | 0.01 | 0.01 | 0.12 | -0.17 | 0.08 | 0.08 | 0.16 | -0.19 | -0.02 | -0.00 |
| **4** | 0.03 | -0.02 | -0.01 | -0.01 | -0.01 | -0.18 | -0.18 | -0.21 | 0.33 | -0.11 | 0.06 | 0.06 |
| **5** | 0.06 | -0.02 | -0.02 | -0.02 | 0.08 | -0.10 | 0.00 | 0.00 | 0.16 | -0.16 | 0.43 | 0.21 |
| **2** | **2** | 0.08 | -0.04 | 0.02 | 0.02 | 0.16 | -0.18 | 0.01 | 0.01 | 0.71 | -0.26 | 0.01 | 0.01 |
| **3** | 0.06 | 0.00 | 0.01 | 0.01 | 0.04 | -0.17 | 0.00 | 0.00 | -0.18 | -0.29 | -0.00 | -0.00 |
| **4** | 0.05 | -0.00 | -0.00 | -0.00 | 0.06 | -0.14 | 0.03 | 0.03 | 0.17 | -0.20 | 0.02 | 0.02 |
| **5** | 0.03 | -0.01 | -0.01 | -0.01 | 0.04 | -0.08 | -0.01 | -0.01 | 0.09 | -0.20 | 0.01 | 0.01 |
| **3** | **2** | 0.02 | -0.04 | 0.00 | 0.00 | 0.04 | -0.16 | 0.01 | 0.01 | 0.17 | -0.50 | -0.01 | -0.01 |
| **3** | 0.02 | -0.01 | -0.00 | -0.00 | 0.04 | -0.15 | 0.01 | 0.01 | 0.03 | -0.25 | 0.00 | 0.00 |
| **4** | 0.02 | 0.00 | 0.00 | 0.00 | 0.03 | -0.14 | 0.01 | 0.01 | 0.05 | -0.15 | 0.02 | 0.02 |
| **5** | 0.02 | -0.00 | 0.00 | 0.00 | 0.03 | -0.05 | 0.01 | 0.01 | 0.03 | -0.16 | 0.01 | 0.01 |
| **4** | **2** | 0.00 | -0.05 | -0.01 | -0.01 | 0.04 | -0.14 | 0.02 | 0.02 | 0.05 | -0.45 | 0.01 | 0.01 |
| **3** | 0.01 | 0.00 | 0.01 | 0.01 | 0.02 | -0.15 | 0.00 | 0.00 | 0.01 | -0.24 | 0.00 | 0.00 |
| **4** | 0.01 | 0.00 | 0.00 | 0.00 | 0.01 | -0.15 | -0.00 | -0.00 | 0.02 | -0.15 | 0.00 | 0.00 |
| **5** | 0.01 | 0.00 | 0.00 | 0.00 | 0.01 | -0.05 | 0.00 | 0.00 | 0.01 | -0.16 | 0.00 | 0.00 |
| **22** | **1** | **2** | 0.04 | -0.08 | -0.01 | -0.01 | 0.31 | -0.13 | 0.04 | 0.05 | 1.04 | -0.10 | -0.04 | -0.02 |
| **3** | 0.06 | -0.00 | 0.01 | 0.01 | 0.16 | -0.15 | 0.05 | 0.05 | 0.24 | -0.18 | 0.01 | 0.04 |
| **4** | 0.08 | -0.00 | 0.00 | 0.00 | 0.07 | -0.18 | -0.04 | -0.09 | 0.25 | -0.15 | 0.04 | 0.05 |
| **5** | 0.03 | -0.02 | -0.02 | -0.01 | 0.10 | -0.08 | 0.01 | 0.01 | 0.15 | -0.18 | -0.96 | -0.96 |
| **2** | **2** | 0.01 | -0.05 | 0.00 | 0.00 | 0.10 | -0.18 | 0.01 | 0.01 | 0.50 | -0.32 | 0.01 | 0.01 |
| **3** | 0.01 | 0.00 | 0.00 | 0.00 | 0.05 | -0.19 | -0.01 | -0.01 | 0.01 | -0.25 | 0.03 | 0.03 |
| **4** | 0.03 | 0.01 | 0.01 | 0.01 | 0.03 | -0.18 | -0.02 | -0.02 | 0.13 | -0.23 | 0.00 | 0.00 |
| **5** | -0.00 | -0.01 | -0.01 | -0.01 | 0.05 | -0.06 | 0.01 | 0.01 | 0.10 | -0.20 | 0.02 | 0.02 |
| **3** | **2** | -0.02 | -0.04 | 0.01 | 0.01 | 0.04 | -0.17 | -0.01 | -0.01 | 0.13 | -0.47 | 0.01 | 0.01 |
| **3** | -0.01 | 0.01 | 0.01 | 0.01 | 0.05 | -0.15 | 0.01 | 0.01 | 0.05 | -0.25 | 0.00 | 0.00 |
| **4** | -0.02 | -0.01 | -0.01 | -0.01 | 0.05 | -0.14 | 0.01 | 0.01 | 0.04 | -0.18 | 0.00 | 0.00 |
| **5** | -0.02 | -0.00 | 0.00 | 0.00 | 0.02 | -0.07 | 0.00 | 0.00 | 0.04 | -0.18 | 0.01 | 0.01 |
| **4** | **2** | -0.04 | -0.04 | 0.00 | 0.00 | 0.04 | -0.15 | 0.01 | 0.01 | 0.06 | -0.48 | 0.01 | 0.01 |
| **3** | -0.03 | -0.01 | -0.01 | -0.01 | 0.02 | -0.16 | -0.01 | -0.01 | 0.03 | -0.25 | -0.01 | -0.01 |
| **4** | -0.01 | 0.01 | 0.01 | 0.01 | 0.04 | -0.14 | 0.01 | 0.01 | 0.03 | -0.16 | 0.01 | 0.01 |
| **5** | -0.03 | -0.00 | 0.00 | 0.00 | 0.01 | -0.07 | -0.01 | -0.01 | 0.03 | -0.17 | 0.00 | 0.00 |

|  | | | **D** | | | | | | | | | | | |
| --- | --- | --- | --- | --- | --- | --- | --- | --- | --- | --- | --- | --- | --- | --- |
| **1** | | | | **2** | | | | **3** | | | |
| **METHOD** | | | | **METHOD** | | | | **METHOD** | | | |
| **1** | **2** | **3** | **4** | **1** | **2** | **3** | **4** | **1** | **2** | **3** | **4** |
| **RML** | **RML** | **RML** | **RML** | **RML** | **RML** | **RML** | **RML** | **RML** | **RML** | **RML** | **RML** |
| **Mean** | **Mean** | **Mean** | **Mean** | **Mean** | **Mean** | **Mean** | **Mean** | **Mean** | **Mean** | **Mean** | **Mean** |
| **MT** | **N** | **C** | 0.11 | 0.17 | 0.11 | 0.11 | 0.15 | 0.25 | 0.15 | 0.15 | 0.19 | 0.41 | 0.24 | 0.24 |
| **0** | **1** | **2** |
| **3** | 0.10 | 0.13 | 0.10 | 0.10 | 0.14 | 0.21 | 0.14 | 0.14 | 0.18 | 0.25 | 0.17 | 0.16 |
| **4** | 0.09 | 0.11 | 0.09 | 0.09 | 0.13 | 0.19 | 0.13 | 0.13 | 0.18 | 0.26 | 0.15 | 0.15 |
| **5** | 0.08 | 0.09 | 0.08 | 0.08 | 0.09 | 0.13 | 0.09 | 0.09 | 0.14 | 0.23 | 0.56 | 0.03 |
| **2** | **2** | 0.08 | 0.15 | 0.08 | 0.08 | 0.10 | 0.26 | 0.10 | 0.10 | 0.14 | 0.30 | 0.14 | 0.14 |
| **3** | 0.07 | 0.11 | 0.07 | 0.07 | 0.10 | 0.18 | 0.09 | 0.09 | 0.11 | 0.21 | 0.11 | 0.11 |
| **4** | 0.06 | 0.10 | 0.10 | 0.10 | 0.09 | 0.16 | 0.09 | 0.09 | 0.11 | 0.22 | 0.10 | 0.10 |
| **5** | 0.05 | 0.07 | 0.05 | 0.05 | 0.06 | 0.11 | 0.06 | 0.06 | 0.09 | 0.19 | 0.09 | 0.09 |
| **3** | **2** | 0.05 | 0.14 | 0.05 | 0.05 | 0.06 | 0.52 | 0.06 | 0.06 | 0.09 | 0.28 | 0.09 | 0.09 |
| **3** | 0.04 | 0.10 | 0.04 | 0.04 | 0.06 | 0.16 | 0.06 | 0.06 | 0.07 | 0.18 | 0.07 | 0.07 |
| **4** | 0.04 | 0.08 | 0.04 | 0.04 | 0.05 | 0.15 | 0.05 | 0.05 | 0.07 | 0.19 | 0.06 | 0.06 |
| **5** | 0.03 | 0.05 | 0.03 | 0.03 | 0.04 | 0.09 | 0.04 | 0.04 | 0.06 | 0.16 | 0.05 | 0.05 |
| **4** | **2** | 0.03 | 0.13 | 0.03 | 0.03 | 0.05 | 0.62 | 0.05 | 0.05 | 0.06 | 0.36 | 0.06 | 0.06 |
| **3** | 0.03 | 0.10 | 0.03 | 0.03 | 0.04 | 0.16 | 0.04 | 0.04 | 0.05 | 0.17 | 0.05 | 0.05 |
| **4** | 0.03 | 0.08 | 0.03 | 0.03 | 0.04 | 0.14 | 0.04 | 0.04 | 0.05 | 0.18 | 0.04 | 0.04 |
| **5** | 0.02 | 0.05 | 0.02 | 0.02 | 0.03 | 0.09 | 0.03 | 0.03 | 0.04 | 0.16 | 0.04 | 0.04 |
| **11** | **1** | **2** | 0.12 | 0.17 | 0.12 | 0.12 | 0.15 | 0.25 | 0.16 | 0.16 | 0.18 | 0.40 | 0.26 | 0.26 |
| **3** | 0.11 | 0.13 | 0.10 | 0.10 | 0.15 | 0.22 | 0.15 | 0.15 | 0.18 | 0.26 | 0.18 | 0.18 |
| **4** | 0.09 | 0.12 | 0.09 | 0.09 | 0.13 | 0.20 | 0.13 | 0.13 | 0.18 | 0.26 | 0.16 | 0.16 |
| **5** | 0.08 | 0.09 | 0.08 | 0.08 | 0.10 | 0.14 | 0.09 | 0.09 | 0.14 | 0.23 | 0.14 | 0.14 |
| **2** | **2** | 0.08 | 0.15 | 0.08 | 0.08 | 0.11 | 0.27 | 0.11 | 0.11 | 0.14 | 0.33 | 0.15 | 0.15 |
| **3** | 0.07 | 0.11 | 0.07 | 0.07 | 0.10 | 0.19 | 0.10 | 0.10 | 0.12 | 0.21 | 0.11 | 0.11 |
| **4** | 0.07 | 0.10 | 0.06 | 0.06 | 0.09 | 0.17 | 0.09 | 0.09 | 0.11 | 0.22 | 0.11 | 0.11 |
| **5** | 0.06 | 0.07 | 0.06 | 0.06 | 0.07 | 0.11 | 0.07 | 0.07 | 0.10 | 0.19 | 0.09 | 0.09 |
| **3** | **2** | 0.05 | 0.14 | 0.05 | 0.05 | 0.07 | 0.53 | 0.07 | 0.07 | 0.09 | 0.30 | 0.09 | 0.09 |
| **3** | 0.04 | 0.10 | 0.04 | 0.04 | 0.06 | 0.17 | 0.06 | 0.06 | 0.07 | 0.18 | 0.07 | 0.07 |
| **4** | 0.04 | 0.08 | 0.04 | 0.04 | 0.06 | 0.15 | 0.06 | 0.06 | 0.07 | 0.19 | 0.06 | 0.06 |
| **5** | 0.04 | 0.05 | 0.04 | 0.04 | 0.04 | 0.09 | 0.04 | 0.04 | 0.06 | 0.17 | 0.06 | 0.06 |
| **4** | **2** | 0.04 | 0.13 | 0.04 | 0.04 | 0.05 | 0.59 | 0.05 | 0.05 | 0.06 | 0.30 | 0.06 | 0.06 |
| **3** | 0.03 | 0.10 | 0.03 | 0.03 | 0.04 | 0.16 | 0.04 | 0.04 | 0.05 | 0.17 | 0.05 | 0.05 |
| **4** | 0.03 | 0.08 | 0.03 | 0.03 | 0.04 | 0.14 | 0.04 | 0.04 | 0.05 | 0.19 | 0.05 | 0.05 |
| **5** | 0.03 | 0.05 | 0.02 | 0.02 | 0.03 | 0.09 | 0.03 | 0.03 | 0.04 | 0.16 | 0.04 | 0.04 |
| **12** | **1** | **2** | 0.12 | 0.17 | 0.12 | 0.12 | 0.15 | 0.25 | 0.16 | 0.16 | 0.18 | 0.41 | 0.25 | 0.25 |
| **3** | 0.10 | 0.13 | 0.10 | 0.10 | 0.14 | 0.21 | 0.14 | 0.14 | 0.18 | 0.25 | 0.18 | 0.17 |
| **4** | 0.10 | 0.12 | 0.23 | 0.28 | 0.13 | 0.20 | 0.13 | 0.13 | 0.18 | 0.26 | . | . |
| **5** | 0.08 | 0.09 | 0.08 | 0.08 | 0.10 | 0.14 | 0.10 | 0.10 | 0.14 | 0.23 | 0.13 | 0.13 |
| **2** | **2** | 0.08 | 0.15 | 0.08 | 0.08 | 0.11 | 0.27 | 0.11 | 0.11 | 0.15 | 0.33 | 0.15 | 0.15 |
| **3** | 0.07 | 0.11 | 0.07 | 0.07 | 0.10 | 0.18 | 0.10 | 0.10 | 0.12 | 0.21 | 0.11 | 0.11 |
| **4** | 0.07 | 0.10 | 0.06 | 0.06 | 0.09 | 0.17 | 0.09 | 0.09 | 0.11 | 0.22 | 0.10 | 0.10 |
| **5** | 0.06 | 0.07 | 0.06 | 0.06 | 0.07 | 0.11 | 0.06 | 0.06 | 0.09 | 0.19 | 0.09 | 0.09 |
| **3** | **2** | 0.05 | 0.14 | 0.05 | 0.05 | 0.07 | 0.50 | 0.07 | 0.07 | 0.09 | 0.35 | 0.09 | 0.09 |
| **3** | 0.05 | 0.10 | 0.04 | 0.04 | 0.06 | 0.17 | 0.06 | 0.06 | 0.07 | 0.18 | 0.07 | 0.07 |
| **4** | 0.04 | 0.08 | 0.04 | 0.04 | 0.06 | 0.15 | 0.06 | 0.06 | 0.07 | 0.19 | 0.06 | 0.06 |
| **5** | 0.04 | 0.05 | 0.03 | 0.03 | 0.04 | 0.10 | 0.04 | 0.04 | 0.06 | 0.16 | 0.06 | 0.06 |
| **4** | **2** | 0.04 | 0.13 | 0.04 | 0.04 | 0.05 | 0.55 | 0.05 | 0.05 | 0.06 | 0.39 | 0.06 | 0.06 |
| **3** | 0.03 | 0.10 | 0.03 | 0.03 | 0.04 | 0.16 | 0.04 | 0.04 | 0.05 | 0.17 | 0.05 | 0.05 |
| **4** | 0.03 | 0.08 | 0.03 | 0.03 | 0.04 | 0.14 | 0.04 | 0.04 | 0.05 | 0.19 | 0.04 | 0.04 |
| **5** | 0.03 | 0.05 | 0.02 | 0.02 | 0.03 | 0.09 | 0.03 | 0.03 | 0.04 | 0.16 | 0.04 | 0.04 |
| **21** | **1** | **2** | 0.15 | 0.19 | 0.16 | 0.16 | 0.18 | 0.28 | 0.22 | 0.22 | 0.17 | 0.39 | 0.37 | 0.38 |
| **3** | 0.14 | 0.16 | 0.14 | 0.14 | 0.22 | 0.25 | 0.22 | 0.22 | 0.31 | 0.30 | 0.26 | 0.25 |
| **4** | 0.12 | 0.14 | 0.13 | 0.13 | 0.20 | 0.23 | 0.19 | 0.19 | 0.19 | 0.29 | 0.22 | 0.21 |
| **5** | 0.11 | 0.11 | 0.11 | 0.11 | 0.13 | 0.17 | 0.13 | 0.13 | 0.16 | 0.27 | 0.25 | 0.29 |
| **2** | **2** | 0.11 | 0.16 | 0.11 | 0.11 | 0.14 | 0.28 | 0.15 | 0.15 | 0.15 | 0.36 | 0.23 | 0.22 |
| **3** | 0.10 | 0.13 | 0.09 | 0.09 | 0.14 | 0.21 | 0.13 | 0.13 | 0.18 | 0.24 | 0.15 | 0.15 |
| **4** | 0.09 | 0.11 | 0.09 | 0.09 | 0.13 | 0.19 | 0.12 | 0.12 | 0.14 | 0.25 | 0.14 | 0.14 |
| **5** | 0.08 | 0.08 | 0.07 | 0.07 | 0.09 | 0.13 | 0.09 | 0.09 | 0.12 | 0.22 | 0.12 | 0.12 |
| **3** | **2** | 0.07 | 0.14 | 0.07 | 0.07 | 0.09 | 0.44 | 0.09 | 0.09 | 0.12 | 0.48 | 0.12 | 0.12 |
| **3** | 0.06 | 0.11 | 0.06 | 0.06 | 0.08 | 0.17 | 0.08 | 0.08 | 0.10 | 0.19 | 0.09 | 0.09 |
| **4** | 0.05 | 0.09 | 0.05 | 0.05 | 0.08 | 0.16 | 0.07 | 0.07 | 0.09 | 0.20 | 0.09 | 0.09 |
| **5** | 0.05 | 0.06 | 0.05 | 0.05 | 0.06 | 0.10 | 0.05 | 0.05 | 0.08 | 0.18 | 0.08 | 0.08 |
| **4** | **2** | 0.05 | 0.14 | 0.05 | 0.05 | 0.06 | 0.53 | 0.06 | 0.06 | 0.09 | 0.46 | 0.08 | 0.08 |
| **3** | 0.04 | 0.10 | 0.04 | 0.04 | 0.06 | 0.16 | 0.06 | 0.06 | 0.07 | 0.18 | 0.06 | 0.06 |
| **4** | 0.04 | 0.08 | 0.04 | 0.04 | 0.05 | 0.15 | 0.05 | 0.05 | 0.06 | 0.19 | 0.06 | 0.06 |
| **5** | 0.03 | 0.05 | 0.03 | 0.03 | 0.04 | 0.09 | 0.04 | 0.04 | 0.06 | 0.16 | 0.05 | 0.05 |
| **22** | **1** | **2** | 0.15 | 0.19 | 0.15 | 0.15 | 0.18 | 0.28 | 0.21 | 0.21 | 0.18 | 0.37 | 0.35 | 0.36 |
| **3** | 0.14 | 0.16 | 0.13 | 0.14 | 0.19 | 0.24 | . | . | 0.26 | 0.28 | 0.24 | 0.24 |
| **4** | 0.15 | 0.14 | 0.13 | 0.13 | 0.17 | 0.22 | 0.18 | 0.18 | 0.18 | 0.29 | 0.22 | 0.21 |
| **5** | 0.11 | 0.11 | 0.11 | 0.11 | 0.13 | 0.17 | 0.14 | 0.14 | 0.16 | 0.26 | . | . |
| **2** | **2** | 0.11 | 0.16 | 0.11 | 0.11 | 0.13 | 0.27 | 0.14 | 0.14 | 0.16 | 0.38 | 0.20 | 0.20 |
| **3** | 0.10 | 0.13 | 0.09 | 0.09 | 0.13 | 0.20 | 0.12 | 0.13 | 0.16 | 0.24 | 0.15 | 0.15 |
| **4** | 0.09 | 0.11 | 0.09 | 0.09 | 0.12 | 0.19 | 0.12 | 0.12 | 0.13 | 0.24 | 0.14 | 0.14 |
| **5** | 0.08 | 0.08 | 0.07 | 0.07 | 0.09 | 0.13 | 0.08 | 0.08 | 0.12 | 0.22 | 0.12 | 0.12 |
| **3** | **2** | 0.07 | 0.14 | 0.07 | 0.07 | 0.09 | 0.36 | 0.09 | 0.09 | 0.11 | 0.49 | 0.11 | 0.11 |
| **3** | 0.06 | 0.11 | 0.06 | 0.06 | 0.08 | 0.18 | 0.08 | 0.08 | 0.09 | 0.20 | 0.09 | 0.09 |
| **4** | 0.06 | 0.09 | 0.05 | 0.05 | 0.07 | 0.16 | 0.07 | 0.07 | 0.09 | 0.21 | 0.09 | 0.09 |
| **5** | 0.05 | 0.06 | 0.05 | 0.05 | 0.06 | 0.11 | 0.05 | 0.05 | 0.08 | 0.18 | 0.07 | 0.07 |
| **4** | **2** | 0.06 | 0.14 | 0.05 | 0.05 | 0.06 | 0.35 | 0.06 | 0.06 | 0.08 | 0.47 | 0.08 | 0.08 |
| **3** | 0.04 | 0.10 | 0.04 | 0.04 | 0.06 | 0.17 | 0.05 | 0.05 | 0.06 | 0.18 | 0.06 | 0.06 |
| **4** | 0.04 | 0.08 | 0.04 | 0.04 | 0.05 | 0.15 | 0.05 | 0.05 | 0.06 | 0.19 | 0.06 | 0.06 |
| **5** | 0.04 | 0.05 | 0.03 | 0.03 | 0.04 | 0.10 | 0.04 | 0.04 | 0.05 | 0.17 | 0.05 | 0.05 |

|  | | | **D** | | | | | | | | | | | |
| --- | --- | --- | --- | --- | --- | --- | --- | --- | --- | --- | --- | --- | --- | --- |
| **1** | | | | **2** | | | | **3** | | | |
| **METHOD** | | | | **METHOD** | | | | **METHOD** | | | |
| **1** | **2** | **3** | **4** | **1** | **2** | **3** | **4** | **1** | **2** | **3** | **4** |
| **RMC** | **RMC** | **RMC** | **RMC** | **RMC** | **RMC** | **RMC** | **RMC** | **RMC** | **RMC** | **RMC** | **RMC** |
| **Mean** | **Mean** | **Mean** | **Mean** | **Mean** | **Mean** | **Mean** | **Mean** | **Mean** | **Mean** | **Mean** | **Mean** |
| **MT** | **N** | **C** | 0.15 | 0.14 | 0.15 | 0.15 | 0.21 | 0.19 | 0.20 | 0.20 | 0.24 | 0.23 | 0.28 | 0.27 |
| **0** | **1** | **2** |
| **3** | 0.13 | 0.13 | 0.13 | 0.13 | 0.20 | 0.18 | 0.18 | 0.18 | 0.31 | 0.21 | 0.21 | 0.21 |
| **4** | 0.13 | 0.13 | 0.13 | 0.13 | 0.18 | 0.17 | 0.16 | 0.16 | 0.31 | 0.20 | 0.18 | 0.18 |
| **5** | 0.12 | 0.12 | 0.12 | 0.12 | 0.13 | 0.14 | 0.13 | 0.13 | 0.25 | 0.19 | 0.47 | 0.04 |
| **2** | **2** | 0.10 | 0.10 | 0.10 | 0.10 | 0.13 | 0.13 | 0.13 | 0.13 | 0.18 | 0.18 | 0.17 | 0.17 |
| **3** | 0.09 | 0.09 | 0.09 | 0.09 | 0.13 | 0.12 | 0.12 | 0.12 | 0.16 | 0.16 | 0.14 | 0.14 |
| **4** | 0.09 | 0.09 | 0.14 | 0.14 | 0.12 | 0.12 | 0.11 | 0.11 | 0.20 | 0.13 | 0.12 | 0.12 |
| **5** | 0.08 | 0.08 | 0.08 | 0.08 | 0.09 | 0.10 | 0.09 | 0.09 | 0.12 | 0.13 | 0.10 | 0.10 |
| **3** | **2** | 0.06 | 0.06 | 0.06 | 0.06 | 0.08 | 0.09 | 0.08 | 0.08 | 0.11 | 0.15 | 0.10 | 0.10 |
| **3** | 0.06 | 0.06 | 0.06 | 0.06 | 0.08 | 0.08 | 0.07 | 0.07 | 0.09 | 0.11 | 0.09 | 0.09 |
| **4** | 0.06 | 0.06 | 0.06 | 0.06 | 0.08 | 0.08 | 0.07 | 0.07 | 0.08 | 0.09 | 0.07 | 0.07 |
| **5** | 0.05 | 0.05 | 0.05 | 0.05 | 0.06 | 0.06 | 0.06 | 0.06 | 0.07 | 0.09 | 0.06 | 0.06 |
| **4** | **2** | 0.05 | 0.05 | 0.04 | 0.04 | 0.06 | 0.07 | 0.05 | 0.05 | 0.08 | 0.15 | 0.07 | 0.07 |
| **3** | 0.04 | 0.04 | 0.04 | 0.04 | 0.06 | 0.07 | 0.05 | 0.05 | 0.06 | 0.09 | 0.06 | 0.06 |
| **4** | 0.04 | 0.04 | 0.04 | 0.04 | 0.05 | 0.06 | 0.05 | 0.05 | 0.05 | 0.07 | 0.05 | 0.05 |
| **5** | 0.04 | 0.04 | 0.04 | 0.04 | 0.04 | 0.04 | 0.04 | 0.04 | 0.05 | 0.07 | 0.05 | 0.05 |
| **11** | **1** | **2** | 0.16 | 0.15 | 0.15 | 0.15 | 0.20 | 0.19 | 0.19 | 0.19 | 0.25 | 0.25 | 0.29 | 0.28 |
| **3** | 0.14 | 0.14 | 0.14 | 0.14 | 0.22 | 0.19 | 0.19 | 0.19 | 0.32 | 0.22 | 0.21 | 0.21 |
| **4** | 0.13 | 0.13 | 0.13 | 0.13 | 0.19 | 0.17 | 0.17 | 0.17 | 0.27 | 0.19 | 0.18 | 0.18 |
| **5** | 0.12 | 0.12 | 0.12 | 0.12 | 0.13 | 0.14 | 0.13 | 0.13 | 0.21 | 0.19 | 0.16 | 0.16 |
| **2** | **2** | 0.10 | 0.10 | 0.10 | 0.10 | 0.14 | 0.14 | 0.13 | 0.13 | 0.18 | 0.19 | 0.18 | 0.18 |
| **3** | 0.09 | 0.09 | 0.09 | 0.09 | 0.13 | 0.13 | 0.12 | 0.12 | 0.18 | 0.17 | 0.15 | 0.15 |
| **4** | 0.09 | 0.09 | 0.09 | 0.09 | 0.13 | 0.12 | 0.11 | 0.11 | 0.15 | 0.14 | 0.12 | 0.12 |
| **5** | 0.09 | 0.09 | 0.09 | 0.09 | 0.09 | 0.10 | 0.09 | 0.09 | 0.11 | 0.14 | 0.11 | 0.11 |
| **3** | **2** | 0.06 | 0.06 | 0.06 | 0.06 | 0.09 | 0.09 | 0.08 | 0.08 | 0.11 | 0.15 | 0.10 | 0.10 |
| **3** | 0.06 | 0.06 | 0.06 | 0.06 | 0.08 | 0.09 | 0.08 | 0.08 | 0.10 | 0.11 | 0.09 | 0.09 |
| **4** | 0.06 | 0.06 | 0.06 | 0.06 | 0.08 | 0.08 | 0.07 | 0.07 | 0.08 | 0.09 | 0.07 | 0.07 |
| **5** | 0.05 | 0.05 | 0.05 | 0.05 | 0.06 | 0.06 | 0.06 | 0.06 | 0.07 | 0.09 | 0.07 | 0.07 |
| **4** | **2** | 0.05 | 0.05 | 0.05 | 0.05 | 0.06 | 0.07 | 0.06 | 0.06 | 0.08 | 0.13 | 0.07 | 0.07 |
| **3** | 0.04 | 0.04 | 0.04 | 0.04 | 0.06 | 0.07 | 0.05 | 0.05 | 0.07 | 0.09 | 0.06 | 0.06 |
| **4** | 0.04 | 0.04 | 0.04 | 0.04 | 0.05 | 0.07 | 0.05 | 0.05 | 0.06 | 0.07 | 0.05 | 0.05 |
| **5** | 0.04 | 0.04 | 0.04 | 0.04 | 0.04 | 0.04 | 0.04 | 0.04 | 0.05 | 0.07 | 0.05 | 0.05 |
| **12** | **1** | **2** | 0.15 | 0.15 | 0.15 | 0.15 | 0.20 | 0.19 | 0.19 | 0.19 | 0.25 | 0.25 | 0.29 | 0.29 |
| **3** | 0.14 | 0.13 | 0.13 | 0.13 | 0.22 | 0.18 | 0.19 | 0.19 | 0.33 | 0.21 | 0.21 | 0.21 |
| **4** | 0.14 | 0.13 | 0.24 | 0.28 | 0.19 | 0.18 | 0.18 | 0.18 | 0.29 | 0.20 | . | . |
| **5** | 0.13 | 0.12 | 0.12 | 0.12 | 0.14 | 0.14 | 0.13 | 0.13 | 0.21 | 0.19 | 0.18 | 0.18 |
| **2** | **2** | 0.10 | 0.10 | 0.10 | 0.10 | 0.14 | 0.13 | 0.13 | 0.13 | 0.19 | 0.19 | 0.18 | 0.18 |
| **3** | 0.10 | 0.09 | 0.09 | 0.09 | 0.13 | 0.13 | 0.12 | 0.12 | 0.18 | 0.16 | 0.14 | 0.14 |
| **4** | 0.09 | 0.09 | 0.09 | 0.09 | 0.13 | 0.12 | 0.12 | 0.12 | 0.17 | 0.14 | 0.12 | 0.12 |
| **5** | 0.09 | 0.08 | 0.08 | 0.08 | 0.09 | 0.10 | 0.09 | 0.09 | 0.12 | 0.13 | 0.11 | 0.11 |
| **3** | **2** | 0.06 | 0.06 | 0.06 | 0.06 | 0.09 | 0.09 | 0.08 | 0.08 | 0.11 | 0.19 | 0.11 | 0.11 |
| **3** | 0.06 | 0.06 | 0.06 | 0.06 | 0.08 | 0.09 | 0.08 | 0.08 | 0.10 | 0.11 | 0.08 | 0.08 |
| **4** | 0.06 | 0.05 | 0.05 | 0.05 | 0.08 | 0.08 | 0.07 | 0.07 | 0.07 | 0.09 | 0.07 | 0.07 |
| **5** | 0.05 | 0.05 | 0.05 | 0.05 | 0.06 | 0.06 | 0.06 | 0.06 | 0.07 | 0.09 | 0.07 | 0.07 |
| **4** | **2** | 0.05 | 0.05 | 0.05 | 0.05 | 0.06 | 0.07 | 0.06 | 0.06 | 0.08 | 0.16 | 0.08 | 0.08 |
| **3** | 0.04 | 0.04 | 0.04 | 0.04 | 0.06 | 0.07 | 0.05 | 0.05 | 0.07 | 0.09 | 0.06 | 0.06 |
| **4** | 0.04 | 0.04 | 0.04 | 0.04 | 0.06 | 0.07 | 0.05 | 0.05 | 0.05 | 0.07 | 0.05 | 0.05 |
| **5** | 0.04 | 0.04 | 0.04 | 0.04 | 0.04 | 0.04 | 0.04 | 0.04 | 0.05 | 0.07 | 0.05 | 0.05 |
| **21** | **1** | **2** | 0.19 | 0.18 | 0.18 | 0.18 | 0.27 | 0.22 | 0.25 | 0.25 | 0.41 | 0.26 | 0.35 | 0.36 |
| **3** | 0.17 | 0.16 | 0.16 | 0.16 | 0.32 | 0.21 | 0.22 | 0.22 | 0.48 | 0.25 | 0.28 | 0.27 |
| **4** | 0.16 | 0.15 | 0.15 | 0.15 | 0.30 | 0.21 | 0.23 | 0.23 | 0.31 | 0.23 | 0.22 | 0.22 |
| **5** | 0.15 | 0.14 | 0.14 | 0.14 | 0.17 | 0.17 | 0.15 | 0.15 | 0.22 | 0.23 | 0.28 | 0.27 |
| **2** | **2** | 0.12 | 0.11 | 0.11 | 0.11 | 0.17 | 0.16 | 0.16 | 0.16 | 0.27 | 0.22 | 0.23 | 0.23 |
| **3** | 0.11 | 0.10 | 0.10 | 0.10 | 0.18 | 0.15 | 0.15 | 0.15 | 0.30 | 0.18 | 0.17 | 0.17 |
| **4** | 0.11 | 0.10 | 0.10 | 0.10 | 0.16 | 0.14 | 0.13 | 0.13 | 0.18 | 0.17 | 0.15 | 0.15 |
| **5** | 0.10 | 0.10 | 0.10 | 0.10 | 0.11 | 0.11 | 0.10 | 0.10 | 0.14 | 0.16 | 0.12 | 0.12 |
| **3** | **2** | 0.08 | 0.07 | 0.07 | 0.07 | 0.10 | 0.10 | 0.10 | 0.10 | 0.13 | 0.24 | 0.13 | 0.13 |
| **3** | 0.07 | 0.07 | 0.07 | 0.07 | 0.09 | 0.09 | 0.09 | 0.09 | 0.13 | 0.12 | 0.10 | 0.10 |
| **4** | 0.07 | 0.06 | 0.06 | 0.06 | 0.09 | 0.09 | 0.09 | 0.09 | 0.10 | 0.10 | 0.09 | 0.09 |
| **5** | 0.07 | 0.06 | 0.06 | 0.06 | 0.07 | 0.07 | 0.06 | 0.06 | 0.09 | 0.10 | 0.08 | 0.08 |
| **4** | **2** | 0.05 | 0.05 | 0.05 | 0.05 | 0.07 | 0.07 | 0.07 | 0.07 | 0.10 | 0.21 | 0.09 | 0.09 |
| **3** | 0.05 | 0.04 | 0.04 | 0.04 | 0.07 | 0.08 | 0.06 | 0.06 | 0.08 | 0.10 | 0.07 | 0.07 |
| **4** | 0.05 | 0.04 | 0.05 | 0.05 | 0.06 | 0.07 | 0.06 | 0.06 | 0.06 | 0.08 | 0.06 | 0.06 |
| **5** | 0.04 | 0.04 | 0.04 | 0.04 | 0.05 | 0.05 | 0.04 | 0.04 | 0.06 | 0.08 | 0.05 | 0.05 |
| **22** | **1** | **2** | 0.19 | 0.18 | 0.18 | 0.18 | 0.24 | 0.21 | 0.23 | 0.23 | 0.37 | 0.26 | 0.33 | 0.34 |
| **3** | 0.18 | 0.17 | 0.17 | 0.17 | 0.29 | 0.20 | . | . | 0.40 | 0.24 | 0.26 | 0.26 |
| **4** | 0.17 | 0.15 | 0.15 | 0.15 | 0.27 | 0.20 | 0.25 | 0.24 | 0.28 | 0.24 | 0.24 | 0.23 |
| **5** | 0.15 | 0.14 | 0.14 | 0.14 | 0.17 | 0.16 | 0.17 | 0.17 | 0.22 | 0.22 | . | . |
| **2** | **2** | 0.13 | 0.12 | 0.12 | 0.12 | 0.17 | 0.15 | 0.15 | 0.15 | 0.24 | 0.22 | 0.22 | 0.22 |
| **3** | 0.12 | 0.11 | 0.11 | 0.11 | 0.16 | 0.14 | 0.14 | 0.14 | 0.26 | 0.17 | 0.17 | 0.17 |
| **4** | 0.11 | 0.10 | 0.10 | 0.10 | 0.16 | 0.14 | 0.14 | 0.14 | 0.17 | 0.17 | 0.15 | 0.15 |
| **5** | 0.10 | 0.10 | 0.10 | 0.10 | 0.12 | 0.11 | 0.10 | 0.10 | 0.15 | 0.16 | 0.13 | 0.13 |
| **3** | **2** | 0.08 | 0.08 | 0.08 | 0.08 | 0.11 | 0.10 | 0.10 | 0.10 | 0.14 | 0.23 | 0.13 | 0.13 |
| **3** | 0.07 | 0.07 | 0.07 | 0.07 | 0.10 | 0.09 | 0.09 | 0.09 | 0.12 | 0.12 | 0.10 | 0.10 |
| **4** | 0.07 | 0.07 | 0.07 | 0.07 | 0.09 | 0.09 | 0.08 | 0.08 | 0.10 | 0.11 | 0.09 | 0.09 |
| **5** | 0.06 | 0.06 | 0.06 | 0.06 | 0.07 | 0.07 | 0.07 | 0.07 | 0.09 | 0.10 | 0.08 | 0.08 |
| **4** | **2** | 0.05 | 0.05 | 0.05 | 0.05 | 0.07 | 0.08 | 0.06 | 0.06 | 0.10 | 0.23 | 0.09 | 0.09 |
| **3** | 0.05 | 0.05 | 0.05 | 0.05 | 0.07 | 0.08 | 0.06 | 0.06 | 0.08 | 0.10 | 0.07 | 0.07 |
| **4** | 0.05 | 0.05 | 0.05 | 0.05 | 0.07 | 0.07 | 0.06 | 0.06 | 0.07 | 0.08 | 0.06 | 0.06 |
| **5** | 0.04 | 0.04 | 0.04 | 0.04 | 0.05 | 0.05 | 0.05 | 0.05 | 0.06 | 0.08 | 0.05 | 0.05 |

|  | | | **D** | | | | | | | | | | | |
| --- | --- | --- | --- | --- | --- | --- | --- | --- | --- | --- | --- | --- | --- | --- |
| **1** | | | | **2** | | | | **3** | | | |
| **METHOD** | | | | **METHOD** | | | | **METHOD** | | | |
| **1** | **2** | **3** | **4** | **1** | **2** | **3** | **4** | **1** | **2** | **3** | **4** |
| **BSEL** | **BSEL** | **BSEL** | **BSEL** | **BSEL** | **BSEL** | **BSEL** | **BSEL** | **BSEL** | **BSEL** | **BSEL** | **BSEL** |
| **Mean** | **Mean** | **Mean** | **Mean** | **Mean** | **Mean** | **Mean** | **Mean** | **Mean** | **Mean** | **Mean** | **Mean** |
| **MT** | **N** | **C** | -0.07 | 0.01 | -0.04 | 0.01 | -0.10 | -0.05 | -0.08 | 0.00 | -0.15 | -0.29 | -0.22 | -0.13 |
| **0** | **1** | **2** |
| **3** | -0.08 | -0.02 | -0.05 | -0.04 | -0.12 | 0.03 | -0.06 | 0.02 | -0.30 | -0.02 | -0.12 | -0.04 |
| **4** | -0.13 | -0.01 | -0.04 | -0.04 | -0.12 | 0.02 | -0.05 | 0.03 | -0.39 | -0.02 | -0.08 | -0.05 |
| **5** | -0.10 | -0.02 | -0.04 | -0.04 | -0.12 | -0.00 | -0.04 | -0.04 | -0.27 | -0.03 | -0.23 | -0.00 |
| **2** | **2** | -0.03 | 0.01 | -0.02 | 0.01 | -0.06 | -0.40 | -0.04 | 0.00 | -0.08 | -0.16 | -0.06 | 0.02 |
| **3** | -0.03 | 0.01 | -0.01 | -0.01 | -0.05 | 0.01 | -0.04 | -0.00 | -0.13 | -0.01 | -0.05 | -0.01 |
| **4** | -0.07 | -0.01 | -0.19 | -0.19 | -0.07 | 0.01 | -0.04 | -0.00 | -0.14 | -0.03 | -0.03 | -0.02 |
| **5** | -0.05 | -0.01 | -0.02 | -0.02 | -0.06 | -0.02 | -0.02 | -0.03 | -0.12 | -0.01 | -0.03 | -0.03 |
| **3** | **2** | -0.02 | -0.01 | -0.02 | -0.01 | -0.02 | -0.84 | -0.01 | 0.00 | -0.04 | -0.41 | -0.03 | 0.00 |
| **3** | -0.01 | 0.00 | -0.01 | -0.00 | -0.02 | 0.00 | -0.01 | 0.00 | -0.04 | 0.00 | -0.02 | 0.00 |
| **4** | -0.02 | 0.00 | -0.00 | -0.00 | -0.01 | 0.01 | 0.00 | 0.01 | -0.04 | 0.01 | -0.02 | -0.02 |
| **5** | -0.01 | -0.00 | -0.01 | -0.01 | -0.01 | -0.00 | -0.00 | -0.01 | -0.04 | -0.01 | -0.01 | -0.02 |
| **4** | **2** | 0.01 | 0.02 | 0.01 | 0.02 | -0.01 | -0.90 | -0.01 | -0.00 | -0.02 | -0.74 | -0.02 | -0.00 |
| **3** | -0.01 | -0.00 | -0.01 | -0.01 | -0.01 | -0.00 | -0.00 | 0.00 | -0.02 | 0.00 | -0.00 | 0.00 |
| **4** | -0.02 | -0.01 | -0.01 | -0.02 | -0.01 | -0.00 | -0.01 | -0.00 | -0.01 | -0.00 | -0.01 | -0.01 |
| **5** | -0.01 | -0.00 | -0.00 | -0.00 | -0.01 | 0.00 | -0.00 | -0.00 | -0.00 | 0.01 | 0.01 | 0.01 |
| **11** | **1** | **2** | -0.06 | 0.03 | -0.04 | 0.02 | -0.09 | -0.05 | -0.08 | 0.01 | -0.09 | -0.25 | -0.26 | -0.17 |
| **3** | -0.09 | -0.02 | -0.06 | -0.05 | -0.13 | 0.04 | -0.07 | 0.02 | -0.32 | -0.02 | -0.14 | -0.05 |
| **4** | -0.13 | -0.01 | -0.04 | -0.04 | -0.13 | 0.03 | -0.06 | 0.02 | -0.33 | -0.03 | -0.09 | -0.06 |
| **5** | -0.10 | -0.02 | -0.04 | -0.03 | -0.11 | -0.01 | -0.03 | -0.03 | -0.29 | -0.02 | -0.07 | -0.04 |
| **2** | **2** | -0.03 | 0.01 | -0.02 | 0.01 | -0.05 | -0.42 | -0.03 | 0.01 | -0.07 | -0.25 | -0.08 | 0.00 |
| **3** | -0.03 | -0.01 | -0.03 | -0.02 | -0.06 | 0.02 | -0.03 | 0.01 | -0.13 | -0.02 | -0.06 | -0.01 |
| **4** | -0.07 | -0.01 | -0.02 | -0.03 | -0.06 | 0.01 | -0.03 | 0.01 | -0.11 | -0.01 | -0.04 | -0.04 |
| **5** | -0.05 | -0.01 | -0.02 | -0.02 | -0.06 | -0.01 | -0.03 | -0.03 | -0.11 | -0.01 | -0.03 | -0.03 |
| **3** | **2** | -0.01 | 0.00 | -0.00 | 0.01 | -0.02 | -0.84 | -0.00 | 0.01 | -0.03 | -0.47 | -0.02 | 0.02 |
| **3** | -0.01 | 0.00 | -0.00 | -0.00 | -0.03 | -0.01 | -0.02 | -0.01 | -0.05 | 0.00 | -0.02 | -0.00 |
| **4** | -0.03 | -0.01 | -0.01 | -0.01 | -0.02 | 0.01 | -0.01 | 0.00 | -0.03 | 0.02 | -0.01 | -0.01 |
| **5** | -0.02 | -0.00 | -0.01 | -0.01 | -0.02 | 0.00 | -0.01 | -0.01 | -0.04 | -0.01 | -0.01 | -0.02 |
| **4** | **2** | -0.00 | 0.00 | 0.00 | 0.01 | -0.01 | -0.90 | -0.00 | 0.01 | -0.02 | -0.63 | -0.01 | 0.00 |
| **3** | -0.02 | -0.01 | -0.02 | -0.02 | -0.01 | 0.01 | 0.00 | 0.01 | -0.02 | 0.00 | -0.00 | 0.00 |
| **4** | -0.03 | -0.02 | -0.02 | -0.02 | -0.01 | -0.00 | -0.01 | 0.00 | -0.01 | 0.01 | 0.00 | -0.00 |
| **5** | 0.00 | 0.01 | 0.01 | 0.01 | -0.01 | -0.01 | -0.01 | -0.01 | -0.00 | 0.01 | 0.01 | 0.00 |
| **12** | **1** | **2** | -0.06 | 0.01 | -0.05 | 0.01 | -0.08 | -0.07 | -0.08 | 0.02 | -0.10 | -0.26 | -0.24 | -0.14 |
| **3** | -0.08 | -0.02 | -0.05 | -0.04 | -0.13 | 0.04 | -0.07 | 0.01 | -0.30 | -0.01 | -0.14 | -0.05 |
| **4** | -0.18 | -0.01 | -0.45 | -0.47 | -0.11 | 0.03 | -0.06 | 0.02 | -0.34 | -0.00 | . | . |
| **5** | -0.10 | -0.02 | -0.04 | -0.04 | -0.13 | -0.02 | -0.05 | -0.05 | -0.25 | -0.01 | -0.02 | -0.00 |
| **2** | **2** | -0.02 | 0.03 | -0.00 | 0.02 | -0.05 | -0.42 | -0.03 | 0.02 | -0.09 | -0.25 | -0.09 | -0.01 |
| **3** | -0.04 | -0.01 | -0.03 | -0.03 | -0.07 | 0.01 | -0.04 | 0.00 | -0.14 | 0.01 | -0.06 | -0.01 |
| **4** | -0.06 | 0.00 | -0.01 | -0.02 | -0.06 | 0.01 | -0.03 | 0.01 | -0.09 | 0.00 | -0.01 | -0.01 |
| **5** | -0.05 | -0.01 | -0.02 | -0.02 | -0.05 | -0.00 | -0.01 | -0.01 | -0.11 | -0.01 | -0.02 | -0.03 |
| **3** | **2** | -0.02 | -0.00 | -0.01 | 0.00 | -0.02 | -0.83 | -0.01 | 0.01 | -0.04 | -0.59 | -0.02 | 0.01 |
| **3** | -0.02 | -0.01 | -0.02 | -0.02 | -0.02 | 0.01 | -0.01 | 0.00 | -0.05 | -0.00 | -0.02 | -0.00 |
| **4** | -0.02 | 0.00 | -0.00 | -0.01 | -0.02 | 0.02 | -0.00 | 0.01 | -0.02 | 0.01 | -0.00 | -0.01 |
| **5** | -0.02 | -0.00 | -0.00 | -0.00 | -0.03 | -0.00 | -0.02 | -0.02 | -0.03 | 0.01 | -0.01 | -0.01 |
| **4** | **2** | -0.02 | -0.01 | -0.01 | -0.00 | -0.02 | -0.89 | -0.01 | -0.00 | -0.02 | -0.75 | -0.01 | 0.00 |
| **3** | -0.02 | -0.01 | -0.01 | -0.01 | -0.02 | -0.00 | -0.01 | -0.00 | -0.03 | -0.01 | -0.02 | -0.01 |
| **4** | -0.00 | 0.01 | 0.00 | 0.00 | -0.03 | -0.01 | -0.02 | -0.01 | -0.00 | 0.01 | 0.00 | 0.00 |
| **5** | -0.01 | -0.00 | -0.01 | -0.01 | -0.01 | 0.00 | 0.00 | -0.00 | -0.02 | 0.00 | -0.01 | -0.01 |
| **21** | **1** | **2** | -0.06 | 0.05 | -0.08 | 0.01 | -0.04 | 0.04 | -0.18 | -0.05 | 0.07 | -0.20 | -0.38 | -0.35 |
| **3** | -0.08 | 0.00 | -0.07 | -0.05 | -0.31 | 0.07 | -0.21 | -0.09 | -0.57 | -0.10 | -0.27 | -0.17 |
| **4** | -0.13 | -0.01 | -0.07 | -0.05 | -0.28 | 0.05 | -0.13 | -0.06 | -0.28 | -0.06 | -0.13 | -0.11 |
| **5** | -0.13 | -0.01 | -0.05 | -0.03 | -0.15 | 0.01 | -0.01 | 0.00 | -0.23 | -0.07 | 0.15 | 0.14 |
| **2** | **2** | -0.04 | 0.02 | -0.03 | 0.02 | -0.06 | -0.26 | -0.08 | 0.01 | 0.06 | -0.18 | -0.21 | -0.10 |
| **3** | -0.04 | -0.01 | -0.04 | -0.03 | -0.11 | 0.02 | -0.06 | 0.01 | -0.30 | -0.00 | -0.09 | 0.00 |
| **4** | -0.09 | -0.01 | -0.03 | -0.03 | -0.11 | 0.03 | -0.05 | 0.01 | -0.10 | -0.00 | -0.05 | -0.02 |
| **5** | -0.08 | -0.01 | -0.03 | -0.02 | -0.09 | -0.01 | -0.03 | -0.03 | -0.15 | -0.03 | -0.05 | -0.03 |
| **3** | **2** | -0.02 | 0.01 | -0.01 | 0.01 | -0.04 | -0.74 | -0.02 | 0.01 | -0.04 | -0.62 | -0.05 | 0.01 |
| **3** | -0.03 | -0.01 | -0.02 | -0.02 | -0.04 | 0.01 | -0.02 | 0.01 | -0.09 | -0.00 | -0.04 | -0.01 |
| **4** | -0.04 | -0.00 | -0.01 | -0.01 | -0.04 | 0.00 | -0.02 | 0.00 | -0.06 | -0.00 | -0.03 | -0.02 |
| **5** | -0.02 | -0.00 | -0.01 | -0.01 | -0.03 | -0.00 | -0.01 | -0.01 | -0.05 | -0.01 | -0.02 | -0.02 |
| **4** | **2** | -0.01 | 0.01 | -0.00 | 0.01 | -0.02 | -0.85 | -0.01 | 0.01 | -0.03 | -0.73 | -0.02 | 0.01 |
| **3** | -0.01 | 0.00 | -0.00 | -0.00 | -0.02 | 0.00 | -0.02 | -0.00 | -0.04 | 0.00 | -0.01 | 0.00 |
| **4** | -0.02 | -0.01 | -0.01 | -0.01 | -0.02 | 0.00 | -0.01 | -0.00 | -0.03 | -0.00 | -0.02 | -0.02 |
| **5** | -0.01 | -0.00 | -0.00 | -0.00 | -0.01 | 0.00 | -0.00 | -0.01 | -0.03 | 0.00 | -0.00 | -0.01 |
| **22** | **1** | **2** | -0.07 | 0.04 | -0.08 | 0.02 | -0.09 | -0.03 | -0.17 | -0.05 | -0.01 | -0.15 | -0.37 | -0.34 |
| **3** | -0.07 | 0.03 | -0.06 | -0.02 | -0.23 | 0.08 | . | . | -0.47 | -0.00 | -0.23 | -0.12 |
| **4** | -0.30 | -0.02 | -0.07 | -0.06 | -0.20 | 0.05 | -0.15 | -0.05 | -0.22 | -0.05 | -0.07 | -0.01 |
| **5** | -0.14 | -0.02 | -0.06 | -0.04 | -0.16 | -0.00 | -0.04 | -0.02 | -0.25 | -0.03 | . | . |
| **2** | **2** | -0.06 | 0.01 | -0.04 | 0.00 | -0.08 | -0.24 | -0.06 | 0.02 | -0.01 | -0.26 | -0.15 | -0.05 |
| **3** | -0.06 | -0.01 | -0.04 | -0.03 | -0.10 | 0.03 | -0.06 | 0.00 | -0.26 | 0.02 | -0.09 | -0.01 |
| **4** | -0.08 | 0.00 | -0.02 | -0.02 | -0.11 | 0.01 | -0.06 | -0.00 | -0.10 | 0.02 | -0.06 | -0.03 |
| **5** | -0.07 | -0.01 | -0.03 | -0.02 | -0.08 | -0.02 | -0.03 | -0.03 | -0.15 | -0.02 | -0.05 | -0.03 |
| **3** | **2** | -0.02 | 0.01 | -0.01 | 0.01 | -0.05 | -0.70 | -0.04 | -0.01 | -0.04 | -0.65 | -0.04 | 0.01 |
| **3** | -0.01 | 0.01 | -0.00 | 0.00 | -0.04 | 0.01 | -0.02 | 0.00 | -0.07 | 0.01 | -0.03 | -0.00 |
| **4** | -0.03 | -0.00 | -0.01 | -0.01 | -0.04 | 0.00 | -0.02 | 0.00 | -0.06 | 0.01 | -0.03 | -0.02 |
| **5** | -0.03 | -0.01 | -0.01 | -0.01 | -0.03 | -0.00 | -0.01 | -0.02 | -0.06 | -0.01 | -0.03 | -0.03 |
| **4** | **2** | -0.01 | 0.00 | -0.00 | 0.00 | -0.02 | -0.78 | -0.01 | 0.00 | -0.04 | -0.75 | -0.02 | 0.00 |
| **3** | -0.01 | 0.01 | 0.00 | 0.00 | -0.02 | -0.00 | -0.02 | -0.00 | -0.04 | 0.00 | -0.01 | 0.00 |
| **4** | -0.01 | -0.00 | -0.00 | -0.01 | -0.02 | -0.00 | -0.01 | -0.00 | -0.02 | 0.00 | -0.01 | -0.01 |
| **5** | -0.02 | -0.01 | -0.01 | -0.01 | -0.02 | -0.01 | -0.02 | -0.02 | -0.03 | 0.00 | -0.01 | -0.01 |

|  | | | **D** | | | | | | | | | | | |
| --- | --- | --- | --- | --- | --- | --- | --- | --- | --- | --- | --- | --- | --- | --- |
| **1** | | | | **2** | | | | **3** | | | |
| **METHOD** | | | | **METHOD** | | | | **METHOD** | | | |
| **1** | **2** | **3** | **4** | **1** | **2** | **3** | **4** | **1** | **2** | **3** | **4** |
| **BSEC** | **BSEC** | **BSEC** | **BSEC** | **BSEC** | **BSEC** | **BSEC** | **BSEC** | **BSEC** | **BSEC** | **BSEC** | **BSEC** |
| **Mean** | **Mean** | **Mean** | **Mean** | **Mean** | **Mean** | **Mean** | **Mean** | **Mean** | **Mean** | **Mean** | **Mean** |
| **MT** | **N** | **C** | -0.11 | 0.04 | -0.04 | 0.05 | -0.21 | 0.06 | -0.09 | 0.03 | -0.10 | 0.10 | -0.13 | 0.04 |
| **0** | **1** | **2** |
| **3** | -0.13 | -0.00 | -0.05 | -0.01 | -0.25 | 0.09 | -0.06 | 0.05 | -0.54 | 0.08 | -0.10 | 0.01 |
| **4** | -0.24 | -0.01 | -0.06 | -0.03 | -0.22 | 0.09 | -0.04 | 0.06 | -0.80 | 0.05 | -0.09 | -0.06 |
| **5** | -0.18 | -0.03 | -0.06 | -0.03 | -0.23 | 0.00 | -0.07 | -0.04 | -0.65 | 0.01 | 0.04 | 0.00 |
| **2** | **2** | -0.06 | 0.03 | -0.02 | 0.02 | -0.09 | 0.06 | -0.03 | 0.03 | -0.15 | 0.07 | -0.04 | 0.06 |
| **3** | -0.06 | 0.00 | -0.02 | 0.00 | -0.10 | 0.04 | -0.03 | 0.02 | -0.25 | 0.02 | -0.04 | 0.02 |
| **4** | -0.13 | -0.01 | -0.19 | -0.17 | -0.11 | 0.04 | -0.02 | 0.02 | -0.59 | 0.03 | -0.02 | -0.01 |
| **5** | -0.07 | 0.01 | -0.00 | 0.01 | -0.10 | 0.02 | -0.00 | 0.01 | -0.28 | 0.02 | 0.02 | 0.02 |
| **3** | **2** | -0.04 | -0.01 | -0.02 | -0.01 | -0.04 | 0.02 | -0.01 | 0.01 | -0.07 | -0.16 | -0.02 | 0.01 |
| **3** | -0.03 | -0.00 | -0.01 | -0.00 | -0.03 | 0.03 | -0.00 | 0.02 | -0.09 | -0.01 | -0.04 | -0.02 |
| **4** | -0.07 | -0.03 | -0.03 | -0.03 | -0.05 | -0.00 | -0.00 | 0.02 | -0.07 | 0.01 | 0.02 | 0.02 |
| **5** | -0.01 | 0.02 | 0.02 | 0.02 | -0.03 | 0.03 | -0.01 | -0.00 | -0.07 | -0.01 | 0.02 | 0.02 |
| **4** | **2** | -0.03 | -0.02 | -0.03 | -0.02 | -0.01 | 0.02 | 0.01 | 0.02 | -0.05 | -0.40 | -0.01 | 0.00 |
| **3** | -0.01 | 0.00 | -0.00 | 0.00 | -0.04 | -0.01 | -0.02 | -0.02 | -0.00 | 0.05 | 0.01 | 0.02 |
| **4** | -0.05 | -0.02 | -0.02 | -0.02 | -0.02 | 0.00 | 0.00 | 0.01 | -0.02 | 0.03 | 0.01 | 0.02 |
| **5** | -0.03 | -0.01 | -0.01 | -0.01 | -0.02 | 0.00 | -0.00 | 0.00 | -0.04 | -0.00 | -0.00 | -0.00 |
| **11** | **1** | **2** | -0.13 | 0.04 | -0.06 | 0.03 | -0.15 | 0.14 | -0.05 | 0.09 | -0.08 | 0.05 | -0.14 | 0.03 |
| **3** | -0.15 | 0.01 | -0.06 | 0.00 | -0.29 | 0.07 | -0.08 | 0.04 | -0.56 | 0.04 | -0.09 | 0.05 |
| **4** | -0.25 | -0.01 | -0.06 | -0.03 | -0.27 | 0.12 | -0.03 | 0.09 | -0.70 | 0.08 | -0.05 | 0.01 |
| **5** | -0.16 | 0.03 | -0.00 | 0.04 | -0.22 | 0.01 | -0.05 | -0.01 | -0.55 | 0.06 | -0.07 | -0.03 |
| **2** | **2** | -0.04 | 0.05 | 0.00 | 0.05 | -0.12 | 0.04 | -0.05 | 0.02 | -0.09 | 0.05 | -0.06 | 0.04 |
| **3** | -0.07 | 0.00 | -0.03 | -0.00 | -0.13 | 0.04 | -0.04 | 0.02 | -0.29 | -0.01 | -0.08 | -0.02 |
| **4** | -0.10 | 0.02 | 0.00 | 0.02 | -0.12 | 0.05 | -0.01 | 0.04 | -0.36 | 0.01 | -0.07 | -0.05 |
| **5** | -0.10 | -0.02 | -0.03 | -0.01 | -0.12 | 0.01 | -0.03 | -0.01 | -0.20 | 0.05 | 0.01 | 0.02 |
| **3** | **2** | -0.01 | 0.02 | 0.00 | 0.02 | -0.05 | 0.01 | -0.03 | -0.00 | -0.04 | -0.19 | -0.00 | 0.03 |
| **3** | -0.00 | 0.03 | 0.02 | 0.03 | -0.06 | 0.01 | -0.02 | 0.00 | -0.09 | 0.01 | -0.04 | -0.01 |
| **4** | -0.05 | -0.00 | -0.01 | -0.00 | -0.05 | 0.02 | -0.03 | -0.01 | -0.07 | 0.02 | -0.02 | -0.01 |
| **5** | -0.03 | 0.00 | -0.01 | 0.00 | -0.07 | -0.02 | -0.03 | -0.02 | -0.07 | 0.01 | -0.01 | -0.00 |
| **4** | **2** | -0.04 | -0.02 | -0.03 | -0.02 | -0.00 | 0.04 | 0.01 | 0.02 | 0.01 | -0.28 | 0.04 | 0.06 |
| **3** | 0.00 | 0.02 | 0.01 | 0.02 | -0.02 | 0.01 | -0.01 | -0.00 | -0.04 | 0.01 | -0.03 | -0.02 |
| **4** | -0.00 | 0.02 | 0.02 | 0.02 | -0.04 | -0.02 | -0.03 | -0.02 | -0.06 | -0.01 | -0.03 | -0.02 |
| **5** | -0.02 | 0.01 | 0.01 | 0.01 | -0.01 | 0.01 | -0.00 | 0.00 | -0.04 | -0.00 | 0.01 | 0.01 |
| **12** | **1** | **2** | -0.13 | 0.05 | -0.05 | 0.05 | -0.16 | 0.13 | -0.05 | 0.09 | -0.08 | 0.08 | -0.16 | 0.00 |
| **3** | -0.15 | 0.01 | -0.05 | 0.01 | -0.31 | 0.07 | -0.09 | 0.03 | -0.57 | 0.05 | -0.08 | 0.05 |
| **4** | -0.26 | 0.02 | -0.45 | -0.51 | -0.24 | 0.06 | -0.11 | -0.00 | -0.74 | 0.04 | . | . |
| **5** | -0.18 | -0.00 | -0.04 | -0.01 | -0.24 | 0.02 | -0.06 | -0.03 | -0.58 | 0.02 | -0.18 | -0.18 |
| **2** | **2** | -0.04 | 0.05 | 0.00 | 0.05 | -0.09 | 0.07 | -0.02 | 0.05 | -0.10 | 0.05 | -0.05 | 0.06 |
| **3** | -0.08 | -0.01 | -0.04 | -0.01 | -0.11 | 0.06 | -0.03 | 0.03 | -0.33 | 0.02 | -0.04 | 0.01 |
| **4** | -0.10 | 0.03 | 0.01 | 0.02 | -0.11 | 0.05 | -0.03 | 0.02 | -0.44 | 0.06 | -0.03 | -0.01 |
| **5** | -0.08 | 0.01 | -0.01 | 0.01 | -0.10 | 0.01 | -0.01 | 0.00 | -0.23 | 0.05 | -0.01 | 0.01 |
| **3** | **2** | -0.01 | 0.03 | 0.01 | 0.03 | -0.04 | 0.03 | -0.02 | 0.00 | -0.05 | -0.32 | -0.00 | 0.03 |
| **3** | -0.02 | 0.01 | -0.00 | 0.01 | -0.05 | 0.02 | -0.02 | 0.00 | -0.08 | 0.03 | 0.02 | 0.04 |
| **4** | -0.03 | 0.03 | 0.02 | 0.03 | -0.03 | 0.04 | -0.01 | 0.01 | -0.02 | 0.09 | 0.04 | 0.04 |
| **5** | -0.03 | 0.00 | -0.00 | 0.00 | -0.05 | -0.01 | -0.01 | -0.00 | -0.11 | -0.03 | -0.05 | -0.04 |
| **4** | **2** | -0.03 | -0.02 | -0.02 | -0.01 | -0.05 | -0.02 | -0.03 | -0.02 | -0.06 | -0.46 | -0.03 | -0.02 |
| **3** | -0.00 | 0.01 | 0.01 | 0.01 | -0.03 | 0.01 | -0.00 | 0.01 | -0.07 | -0.02 | -0.04 | -0.03 |
| **4** | -0.03 | -0.00 | -0.01 | -0.00 | -0.06 | -0.04 | -0.05 | -0.04 | -0.04 | 0.01 | -0.02 | -0.02 |
| **5** | -0.02 | 0.01 | 0.01 | 0.01 | -0.00 | 0.02 | 0.02 | 0.02 | -0.04 | 0.01 | -0.01 | -0.01 |
| **21** | **1** | **2** | -0.21 | 0.08 | -0.10 | 0.04 | -0.17 | 0.14 | -0.13 | 0.06 | 0.14 | 0.03 | -0.17 | -0.01 |
| **3** | -0.23 | 0.03 | -0.08 | 0.01 | -0.51 | 0.16 | -0.08 | 0.08 | -0.73 | -0.05 | -0.15 | 0.00 |
| **4** | -0.34 | 0.02 | -0.07 | 0.01 | -0.51 | 0.08 | -0.12 | -0.03 | -0.60 | -0.00 | -0.05 | 0.04 |
| **5** | -0.28 | 0.03 | -0.04 | 0.03 | -0.35 | 0.07 | -0.02 | 0.07 | -0.53 | -0.04 | -0.06 | 0.01 |
| **2** | **2** | -0.07 | 0.08 | 0.00 | 0.08 | -0.14 | 0.10 | -0.05 | 0.07 | 0.09 | 0.07 | -0.11 | 0.07 |
| **3** | -0.08 | 0.05 | -0.00 | 0.04 | -0.29 | 0.05 | -0.07 | 0.02 | -0.58 | 0.09 | -0.05 | 0.08 |
| **4** | -0.19 | 0.00 | -0.04 | -0.01 | -0.26 | 0.09 | -0.02 | 0.06 | -0.33 | 0.07 | -0.07 | -0.01 |
| **5** | -0.15 | -0.01 | -0.04 | -0.01 | -0.17 | 0.05 | -0.03 | -0.00 | -0.28 | 0.07 | 0.00 | 0.04 |
| **3** | **2** | -0.03 | 0.03 | 0.01 | 0.03 | -0.10 | 0.03 | -0.02 | 0.02 | 0.01 | -0.32 | -0.01 | 0.07 |
| **3** | -0.03 | 0.00 | -0.01 | 0.00 | -0.05 | 0.05 | 0.00 | 0.04 | -0.22 | 0.02 | -0.02 | 0.02 |
| **4** | -0.08 | -0.01 | -0.02 | -0.01 | -0.10 | -0.00 | -0.03 | -0.00 | -0.13 | 0.03 | -0.05 | -0.03 |
| **5** | -0.10 | -0.03 | -0.04 | -0.03 | -0.07 | 0.04 | 0.01 | 0.02 | -0.12 | -0.00 | -0.02 | -0.01 |
| **4** | **2** | -0.04 | -0.00 | -0.01 | 0.00 | -0.02 | 0.05 | 0.01 | 0.03 | -0.05 | -0.50 | -0.02 | 0.02 |
| **3** | 0.01 | 0.04 | 0.03 | 0.04 | -0.07 | -0.01 | -0.04 | -0.02 | -0.06 | 0.02 | -0.01 | 0.01 |
| **4** | -0.06 | -0.01 | -0.02 | -0.02 | -0.04 | 0.01 | -0.02 | -0.01 | -0.03 | 0.05 | 0.02 | 0.03 |
| **5** | -0.01 | 0.03 | 0.03 | 0.04 | -0.02 | 0.02 | 0.02 | 0.03 | -0.06 | 0.03 | 0.01 | 0.01 |
| **22** | **1** | **2** | -0.21 | 0.09 | -0.06 | 0.09 | -0.17 | 0.16 | -0.12 | 0.07 | -0.00 | 0.06 | -0.17 | -0.04 |
| **3** | -0.23 | 0.04 | -0.08 | 0.02 | -0.42 | 0.13 | . | . | -0.65 | 0.03 | -0.13 | 0.05 |
| **4** | -0.38 | 0.05 | -0.05 | 0.02 | -0.44 | 0.09 | -0.26 | -0.14 | -0.57 | -0.04 | -0.04 | -0.02 |
| **5** | -0.25 | 0.06 | -0.01 | 0.05 | -0.34 | 0.05 | -0.10 | -0.06 | -0.54 | 0.03 | . | . |
| **2** | **2** | -0.11 | 0.05 | -0.02 | 0.05 | -0.14 | 0.11 | -0.04 | 0.07 | -0.02 | 0.03 | -0.10 | 0.08 |
| **3** | -0.12 | 0.01 | -0.03 | 0.01 | -0.18 | 0.12 | -0.00 | 0.09 | -0.49 | 0.10 | -0.07 | 0.04 |
| **4** | -0.16 | 0.05 | 0.00 | 0.04 | -0.22 | 0.03 | -0.06 | 0.02 | -0.28 | 0.09 | -0.07 | -0.02 |
| **5** | -0.13 | 0.01 | -0.02 | 0.01 | -0.19 | -0.00 | -0.03 | 0.00 | -0.31 | 0.03 | -0.05 | -0.01 |
| **3** | **2** | -0.08 | -0.01 | -0.04 | -0.01 | -0.11 | -0.01 | -0.06 | -0.02 | -0.09 | -0.37 | -0.06 | 0.00 |
| **3** | -0.07 | -0.01 | -0.03 | -0.01 | -0.07 | 0.02 | -0.04 | -0.00 | -0.14 | 0.04 | -0.01 | 0.03 |
| **4** | -0.09 | -0.01 | -0.03 | -0.02 | -0.05 | 0.03 | -0.00 | 0.03 | -0.11 | 0.04 | -0.02 | -0.01 |
| **5** | -0.05 | 0.02 | 0.00 | 0.02 | -0.09 | 0.00 | -0.04 | -0.03 | -0.13 | -0.00 | -0.03 | -0.02 |
| **4** | **2** | 0.00 | 0.03 | 0.02 | 0.03 | -0.03 | 0.01 | -0.01 | 0.01 | -0.09 | -0.55 | -0.05 | -0.02 |
| **3** | -0.03 | -0.01 | -0.02 | -0.01 | -0.04 | 0.01 | -0.01 | -0.00 | -0.05 | 0.03 | -0.02 | -0.00 |
| **4** | -0.04 | 0.01 | -0.00 | 0.00 | -0.05 | 0.00 | -0.03 | -0.01 | -0.06 | 0.02 | -0.02 | -0.01 |
| **5** | -0.00 | 0.01 | 0.01 | 0.01 | -0.04 | -0.01 | -0.00 | 0.01 | -0.05 | 0.02 | 0.00 | 0.01 |
